# Supplementary material
Source: Atypon-hosted journal article supplement (https://563.library.nashville.org/Record/CARL0000205869/DownloadSupplementalFile?fileId=72)
Supplement: DownloadSupplementalFile [file DownloadSupplementalFile]

## Henry C. Hibbs Papers, 1882 – c. 1988

### Collection Summary

**Creator:** Henry C. Hibbs, 1882-1949

**Title:** Henry C. Hibbs Papers

**Inclusive Dates:** 1882 – c. 1988

**Summary/Abstract:** The papers of Henry C. Hibbs, architect and A.I.A. Fellow, include a diverse range of materials related to his career as a leading designer of academic, religious, and institutional buildings in Nashville, the south and beyond. Mr. Hibbs is best described as a practitioner of “collegiate gothic / neo-gothic” architecture whose designs won him, among other honors, two gold medals from the Southern Architectural and Industrial Arts Exposition in Memphis in 1929.

**Physical Description/Extent:** approx. 75 cubic ft.

**Accession Number:** 2002.007; 2011.042

**Language:** English

**Stack Location:** Closed Stacks Workroom, Range 4, Section 1;  
Flat File Room 1, Hibbs Drawers 1-20 (includes 2 empty drawers for growth);  
Map Storage Room, Shelves 14-15 (rolled storage boxes and oversized books).

**Repository:** Special Collections Division, Nashville Public Library, 615 Church Street, Nashville, Tennessee, 37219.

### Chronology

|                  |                                                                                                                                                                                                               |
|------------------|---------------------------------------------------------------------------------------------------------------------------------------------------------------------------------------------------------------|
| January 26, 1882 | Born in Camden, New Jersey to Jonathan K. and Anna Waples Kirkpatrick Hibbs (of Philadelphia, PA).                                                                                                            |
| 1895 - 1899      | Attended Riverton Public School, Burlington County, New Jersey<br>Attended and graduated from Farnum Preparatory School, Beverly, New Jersey                                                                  |
| c. 1899 - 1904   | Attended University of Pennsylvania, Philadelphia. Graduated with a Bachelor of Science in Architecture<br><br>Apprenticed at the firm of Frank Miles Day and Brother of Philadelphia during summer vacation. |
| c. 1904          | Cope and Stewardson, Philadelphia                                                                                                                                                                             |
| c. 1904-1906     | George B. Post and Sons, New York                                                                                                                                                                             |
| c. 1908-1909     | D. Everett Wade, New York                                                                                                                                                                                     |
| Sept. 28, 1909   | Married Agnes Robertson Bryan (also a graduate of Farnum)                                                                                                                                                     |

|                   |                                                                                                                                                                                                                                                                                                                                                                                                                                                                         |
|-------------------|-------------------------------------------------------------------------------------------------------------------------------------------------------------------------------------------------------------------------------------------------------------------------------------------------------------------------------------------------------------------------------------------------------------------------------------------------------------------------|
| Date undetermined | Opened his own architectural office in New York                                                                                                                                                                                                                                                                                                                                                                                                                         |
| 1909-1913         | <p>Partnered at Van Vleck &amp; Goldsmith Architects, 111 Fifth Ave., New York, New York and designed the following</p> <ul style="list-style-type: none"> <li>○ Westfield, New Jersey post office building, 1911</li> <li>○ Westfield, New Jersey theatre building for Mr. Walter Mooney, n. d.</li> </ul>                                                                                                                                                             |
| 1913-1915         | Worked for Ludlow & Peabody of New York                                                                                                                                                                                                                                                                                                                                                                                                                                 |
| 1914              | Assigned as supervising architect by Ludlow & Peabody for the construction of George Peabody College for Teachers in Nashville, Tennessee                                                                                                                                                                                                                                                                                                                               |
| July 24, 1914     | First Summer Session, George Peabody College for Teachers held.                                                                                                                                                                                                                                                                                                                                                                                                         |
| 1915-1916         | Hibbs remained in Nashville and established his own architectural firm                                                                                                                                                                                                                                                                                                                                                                                                  |
| December 1916     | Young Men's Bible Class Leader at First Presbyterian Church (downtown at Fifth Avenue and Church Street)                                                                                                                                                                                                                                                                                                                                                                |
| 1917              | Elected as Deacon of First Presbyterian Church (Fifth and Church)                                                                                                                                                                                                                                                                                                                                                                                                       |
| March 31, 1919    | Elected as member of the American Institute of Architects.                                                                                                                                                                                                                                                                                                                                                                                                              |
| c.1919-1920       | Served as a sponsor, charter member and first President of the Tennessee chapter of the A.I.A.                                                                                                                                                                                                                                                                                                                                                                          |
| June 1919         | New church house and Sunday School building addition of First Presbyterian Church (Fifth and Church) dedicated.                                                                                                                                                                                                                                                                                                                                                         |
| 1919-1920         | <p>Designed alterations and additions for several local bank buildings such as</p> <ul style="list-style-type: none"> <li>• American National Bank – Stahlman Building, Broad Street and Union Street locations</li> <li>• Fourth &amp; First National Bank – 617 Church Street</li> <li>• First Savings Bank &amp; Trust – 617 Church Street</li> </ul> <p>as well as</p> <ul style="list-style-type: none"> <li>• A school building for Smyrna, Tennessee.</li> </ul> |
| May 15, 1921      | Appointed to Tennessee State Board of Architectural and Engineering Examiners, by Governor A. A. Taylor. Served six years as Secretary-Treasurer.                                                                                                                                                                                                                                                                                                                       |

|                     |                                                                                                                                                                                     |
|---------------------|-------------------------------------------------------------------------------------------------------------------------------------------------------------------------------------|
| May 1921            | Day & Klauder Architects' buildings for Wellesley College, Wellesley, Massachusetts featured in <i>The Architectural Review</i> .                                                   |
| c. 1921             | Nashville Union Stockyards, Inc. building completed.                                                                                                                                |
| June 1922           | Designed the Main Building (Edificio Principal) and Dormitory (Dormitorio) for Granberry College in Juiz de Fora, Brazil.                                                           |
| June 1922           | Installed as Elder at First Presbyterian Church (Fifth and Church)                                                                                                                  |
| 1923                | Finished Blakemore Methodist Church, Educational Building, 30 <sup>th</sup> Ave. and West End                                                                                       |
| c.1923              | Designed alterations & additions to East End M. E. Church, 13 <sup>th</sup> and Holly Streets                                                                                       |
| c. 1924             | Galloway College Science Building, Searcy, Arkansas, erected                                                                                                                        |
| 1924                | Day & Klauder design master plan for Vanderbilt University campus.                                                                                                                  |
| February 1925       | Contracted with American Trust Company to build a fifteen story addition to the west and a ten story addition to the top of the American Trust Building, Third Avenue and Union St. |
| c. May 1925         | Vanderbilt University—Neely Auditorium completed.                                                                                                                                   |
| c. 1925             | Vanderbilt University—Alumni Memorial Hall completed.                                                                                                                               |
| September 24, 1925  | Doors opened at Southwestern campus in Memphis, TN.                                                                                                                                 |
| October 15-18, 1925 | Vanderbilt University Semi-Centennial celebration occurs, where new buildings designed by Hibbs are dedicated                                                                       |
| c. 1925             | Scarritt College for Christian Workers building plans announced.                                                                                                                    |
| c. 1926-1927        | New building for the Southern College of the Y.M.C.A. (a.k.a. Y.M.C.A Graduate School, and later, Wesley Hall) is constructed.                                                      |
| c. 1927-1928        | Buttrick, Calhoun, and Garland Halls erected at Vanderbilt University.                                                                                                              |
| March 14, 1928      | Belle Harris Bennett Memorial dedicatory services held for Scarritt College for Christian Workers                                                                                   |

|                  |                                                                                                                                                                                                                                                                                                                                                                                                                           |
|------------------|---------------------------------------------------------------------------------------------------------------------------------------------------------------------------------------------------------------------------------------------------------------------------------------------------------------------------------------------------------------------------------------------------------------------------|
| September 1928   | Entire issue of <i>Southern Architect and Building News</i> devoted to Mr. Hibbs' work at Scarritt College of Nashville and Southwestern University of Memphis.                                                                                                                                                                                                                                                           |
| November 1929    | Awarded two gold medals – the Milton S. Binswanger gold medal for excellence in ecclesiastical architecture for his design of Scarritt College and the Dr. Charles Diehl gold medal for excellence in educational institutional buildings for Southwestern campus. Awards were given at the Southern Architectural and Industrial Arts Exposition in Memphis, Tenn. and sponsored by the Southern Chapters of the A.I.A.. |
| c. 1929-1930     | Chambers Memorial building completed and building dedicated, Davidson College, Davidson, North Carolina                                                                                                                                                                                                                                                                                                                   |
| 1930             | Served as President of Old Oak Club                                                                                                                                                                                                                                                                                                                                                                                       |
| Nov. 20, 1930    | Fisk University Library dedication held.                                                                                                                                                                                                                                                                                                                                                                                  |
| c. 1930-1931     | Library, Petroleum Engineering and Fine Arts Buildings completed for University of Tulsa, Tulsa, Oklahoma.                                                                                                                                                                                                                                                                                                                |
| February 4, 1932 | Elected as Fellow of the American Institute of Architects                                                                                                                                                                                                                                                                                                                                                                 |
| June 1932        | Awarded honorary Master of Fine Arts degree at Southwestern's commencement exercises, Memphis, TN.                                                                                                                                                                                                                                                                                                                        |
| 1933             | Won second prize in the Davidson County Courthouse competition, as an associate of Paul Cret of Philadelphia.                                                                                                                                                                                                                                                                                                             |
| 1934-1935        | New administration & boys dormitory buildings for Monroe Harding home for orphan children completed                                                                                                                                                                                                                                                                                                                       |
| c. 1935-38       | Additions to Vanderbilt University Hospital and School of Medicine planned and completed by Hibbs.                                                                                                                                                                                                                                                                                                                        |
| October 1936     | Member of Selection Committee for New Pastor of First Presbyterian Church (Fifth and Church)                                                                                                                                                                                                                                                                                                                              |
| February 1937    | New Nashville City Market House building completed.                                                                                                                                                                                                                                                                                                                                                                       |
| Late 1930's      | Hibbs' firm changed to Hibbs, Parrent & Wheeler (H. Clinton Parrent and R. Marret Wheeler)                                                                                                                                                                                                                                                                                                                                |
| c. 1941          | Physical Education Building is erected at Mary Baldwin College in Staunton, VA.                                                                                                                                                                                                                                                                                                                                           |

|               |                                                                                                                     |
|---------------|---------------------------------------------------------------------------------------------------------------------|
| June 2, 1941  | New library building, built by the W.P.A., is dedicated at University of South Carolina, Columbia, South Carolina.  |
| Dec. 5, 1941  | Joint University Library (serving Vanderbilt University, George Peabody College and Scarritt College) is dedicated. |
| Jan. 27, 1943 | Kennedy General Hospital, Memphis, TN dedicated.                                                                    |
| Late 1940's   | Hibbs' firm changed to Hibbs, Parrent & Hall (H. Clinton Parrent and W. Terrill Hall)                               |
| 1948          | Design completed for Nashville Electric Service building                                                            |
| February 1949 | Death of granddaughter Betsy Wheeler (daughter of Elizabeth and R. Marret Wheeler) in North Carolina                |
| March 3, 1949 | Died at St. Thomas Hospital, Nashville, following a heart attack earlier in the day                                 |

### **Biographical/Historical Sketch**

Henry Closson Hibbs was a leading architect in Nashville, Tennessee from 1914 until his death in March 1949. Born in New Jersey in 1882, and educated at Farnum Preparatory School in Beverly, New Jersey and at the University of Pennsylvania, Philadelphia, Hibbs' career and architectural sensibilities were influenced by the Philadelphia and New York architectural firms where he worked while a student and following graduation. Included among these influences was the firm of fellow University of Pennsylvania alumnus Frank Miles Day and Brother and their partner Charles Zeller Klauder.

Henry C. Hibbs' work for Nashville colleges and universities was extensive and his career was directly linked to their growth and development. From the 1910s to the 1940s, as many administrations carried out ambitious building programs enabled substantially by funding from northern philanthropists, Hibbs' architectural designs contributed to what historian Don Doyle described as the desire to replace the "frail foundations" of Nashville's pre-1920's claim as the "Athens of the South" with concrete evidence that these institutions were to play a substantial role in the future of Nashville and in southern higher education.

The dedication of Alumni Memorial Hall and Neely Auditorium—both designed by Hibbs—were central features of Vanderbilt University's centennial celebration in October 1925. It was at this celebration that Chancellor James H. Kirkland "answered Dayton" (the Scopes Trial had occurred in July in Dayton, Tenn.) by committing to construct new science buildings, which Hibbs would also design, along with an addition to the hospital and medical schools. The Fisk University Library, dedicated at a meeting

of the Negro Library Conference held at Fisk in November 1930, was erected as part of a movement to improve educational and library services for southern (and in this case, African American) institutions of higher education. The modern library, which was said to rival libraries at Yale and Dartmouth, was intended to serve as the “heart” of the Fisk campus and future construction was to emanate from it. In some instances, Hibbs drew inspiration from architects like Day and Klauder and from their designs at northern Ivy League schools like Yale, Wellesley, Princeton and Cornell, further evidence that local leaders were looking to elevate the status of their institutions and to create elite centers of advanced learning for the American south.

Beyond Nashville, Hibbs’ work in higher education included significant building projects for: Southwestern (now Rhodes College) in Memphis; for Davidson College in Davidson, North Carolina; at the University of South Carolina in Columbia, South Carolina; and at Galloway College in Searcy, Arkansas. He also performed work for: the University of Tulsa in Tulsa, Oklahoma; Mary Baldwin College in Staunton, Virginia; Hendrix College in Conway, Arkansas; and, Granberry College in Juiz de Fora, Brazil.

Hibbs was most recognized for his signature designs – Scarritt College for Christian Workers (now the Scarritt-Bennett Center) in Nashville and Southwestern (now Rhodes) in Memphis – both of which are best described as examples of the “collegiate gothic / neo-collegiate gothic” style of architecture. It was for these designs that Hibbs won two gold medals for educational and ecclesiastical architecture from the Southern Chapter of the American Institute of Architects at its 1929 design expo in Memphis. Although he frequently drew from classical styles for public buildings—especially for domed buildings like the libraries at Davidson College and the University of South Carolina, as well as the City Market House and Nashville Electric Service buildings in Nashville—and from additional architectural styles for private residences, “collegiate gothic” remained his most defining form.

Mr. Hibbs and his firm designed a number of educational building additions for local churches in Nashville such as a rear addition to the First Presbyterian Church (downtown at Fifth Avenue and Church Street). He was also the architect chosen to design the homes of many of Nashville’s well-to-do families: Vanderbilt’s Chancellor Kirkland; Paul M. Davis, President of The American National Bank; and White Hall Morrison of the Nashville Chair Company, among others.

He supplied designs for an array of private businesses, including the Nashville Union Stockyards, Inc. building and several downtown financial buildings. He designed government buildings such as the aforementioned City Market House and Nashville Electric Service, along with a proposed but never constructed design for the Municipal Auditorium. He also designed hospital buildings such as an addition at Vanderbilt University, the Central State Hospital and the U. S. Army’s Kennedy General Hospital in Memphis.

While the location of Hibbs’ firms changed over time, his primary office address while practicing in Nashville was at the American Trust Building, at the corner of Third

Avenue and Union Street. His primary partner for many years was H. Clinton Parrent, as well as sons-in-law H. Marrett Wheeler and W. Terrill Hall. Following Hibbs' death, Parrent carried out the completion of the N. E. S. project for the firm and Hall established his own firm in 1950.

In conjunction with his professional practice, Hibbs served as an advocate and educator for the architectural profession. He spearheaded establishment of the first Architectural and Engineering Examiners Board for the state of Tennessee and served six years as Secretary/Treasurer. Hibbs is credited with drafting the legislation that eventually became the foundation for regulating the architectural profession in Tennessee. He spoke to community groups and wrote articles about the characteristics of well-designed buildings – all part of his effort to help build local appreciation for architects and their work.

Mr. Hibbs was also active as a civic and community leader. From the early 1920's, he was a member of professional men's groups such as the Old Oak Club and the Coffee House Club and served as President of the former in 1930. It was at the meetings of such organizations that he presented papers like his analysis and discussion of the parallels between music and architecture, entitled "Frozen Music."

He served on the board of directors of the Nashville Y. M. C. A. and represented Tennessee on the national Y. M.C.A. council. He was a thirty-second degree Mason, served on the 1940 Grand Jury for Davidson County Criminal Courts, and was also a member of the National Panel of Arbitrators of the American Arbitration Association in 1944.

He served as an elder at the First Presbyterian Church (downtown at Fifth Avenue and Church Street) and was an active member of the congregation. He and his wife Agnes were frequent sponsors of the church's College Group, holding informal gatherings at their home at 1804 18<sup>th</sup> Avenue, South, and offering an environment so welcoming that it was described as "the second home of many of the College Group attendees." In June 1949, following Hibbs' death, a new auditorium and recreation hall was donated in his memory at the church's Nacome recreation center near Centerville, Tenn.

Henry and Agnes Hibbs had four daughters: Elizabeth Burton, Isabel ("Isobel") Robertson, Harriet Twinning and Agnes Allison.

Mr. Hibbs was an avid fisherman and as a means of relaxation took semi-annual fishing trips with small groups of associates to different southern states.

On March 3, 1949, one month after the death of his granddaughter, Betsy Wheeler, Henry C. Hibbs died of a heart attack at the age of 67. As the news of his death spread, there was an impressive outpouring of grief from within and beyond the Nashville community. Mr. Hibbs was buried at Mt. Olivet Cemetery in Nashville.

### **Scope and Contents of the Collection**

The Henry C. Hibbs Papers include approximately 75 cubic feet of materials that document his life and career as a leading architect in Nashville and the south. The collection dates from 1882 to ca. 1988. The collection is divided into three series: Buildings, Professional and Personal. Within each series are divisions by format such as documents, photographs, oversize materials, negatives, lantern slides and architectural plans. Items within the Buildings series are arranged alphabetically. Items within the Professional and Personal series are arranged in subseries (see below) and then in loose chronological order.

The Henry C. Hibbs Papers contain a variety of materials on the history of Nashville during the first half of the twentieth century. Photographs of Nashville buildings like the American National Bank, the American Trust building, the City Market House, Downtown Fifth and Church [ W. H. Jackson Building, Joseph Frank & Sons ], the rear addition to the First Presbyterian Church (Fifth and Church) and the Nashville Union Stockyards, Inc. are noteworthy because they include views and street scenes of the city in the 1910's and 1920's. The collection includes numerous materials related to the history of higher educational institutions Scarritt College, Fisk University, Peabody College, Southwestern, Vanderbilt University, Davidson College and the University of Tulsa. For example, within the Fisk materials are photographs of artist Aaron Douglas' murals displayed in the interior of the Fisk Library building and brochures containing images of Fisk faculty members such as Charles S. Johnson. Researchers may find useful items such as building dedication programs, promotional brochures, periodical articles, announcements, board of trustee documents, photogravures, news clippings and notes related to the construction of new buildings, where available.

Other noteworthy items in the collection include a plat map of the Fisk University campus that indicates the original location of the Civil War-era's Fort Gillem (renamed Fort Sill) on the ground where Jubilee Hall now stands. While the date of this map is unclear, several clues point to its potential age: the property on the map is noted as belonging to the American Missionary Association and A.J. (P.J.?) Harding; the surrounding streets are named instead of numbered which when compared to a 1908 plat map suggests it is older than 1908 (i.e. – 18<sup>th</sup> Avenue appears as "Salem Street" on the Fisk map); and the map merely indicates "church lot" on the site where Fisk Memorial Chapel was built (c. 1892), which suggests it could potentially pre-date the construction of the chapel.

Another interesting discovery in the collection is a small group of materials relating to the proposed Tennessee Central Railroad Terminal Station & Office Building to be built at First and Broad Streets circa 1930. These materials not only point to a Nashville that might-have-been and the irony of history given the 2006 opening of the Music City Star commuter rail station on this site, but also reveal past realities such as the segregated facilities for blacks and whites incorporated in the planning of the terminal station.

Researchers may also be interested in the artistic value of some of the architectural drawings found in this collection, such as the drawings for the Fisk Library, Scarritt College and residences such as the one designed for the Edward Potter family. See the

detailed Container List below for the buildings and related materials included in the collection.

In addition, there is a wealth of information pertaining to Mr. Hibbs' active and impressive architectural career, along with materials relating to his personal life. See the Series descriptions below for further information.

Researchers should be cautioned that some of the buildings represented in this collection may not be original Hibbs designs. Over the years there has been some misattribution of buildings to Mr. Hibbs. One example is the American Trust building. In several published references, Mr. Hibbs is credited with designing the Trust building located at the corner of Third Avenue and Union Street, when in fact he designed the addition of floors above and to the west of the original building. This collection contains contractual documents from 1925 that make this distinction.

Another example is the W. H. Jackson Building at Fifth Avenue and Church Street which at one time housed the Joseph Frank & Sons clothing store. While there is a photograph of this building in the collection (labeled, "Downtown, Fifth and Church"), it remains unclear whether Mr. Hibbs performed any work related to this building.

Researchers should also be aware that the work of architects W. Terrill Hall and H. Clinton Parrent, Jr. is represented in this collection. Mr. Hall, a son-in-law to Mr. Hibbs, was a partner in the firm, Hibbs, Parrent & Hall in the 1940's and established his own firm in 1950. Less is known about the career of H. Clinton Parrent, however, in the book *Building of Nashville*, Wilbur Creighton argued that much of the credit for Mr. Hibbs' work was dependent upon the drafting skills of his "silent partner for many years, H. Clinton Parrent."

While there is no comprehensive listing of buildings designed by Henry C. Hibbs, there are multiple lists and resources within this collection that could be referenced to create a more complete picture of his career, such as the pocket reference guides found in Series II, Professional Documents section.

As part of the collection, Harriet Hall Cates also donated nearly forty (40) oversized architectural books published in the early to middle twentieth century and covering a range of topics on architectural history.

### **Organization/Arrangement of Materials**

The collection is divided into three series: (1) Buildings; (2) Professional; and (3) Personal. Within each series are divisions by format: photographs, documents, oversize materials, negatives, lantern slides and architectural plans. Items within the Buildings series are arranged alphabetically. Items within the Professional and Personal series are arranged in subseries (see below) and then in loose chronological order.

### **Restrictions**

**Restrictions on Access:** Access is available during the Special Collections Division's open hours, which are the same as the Main Library's [http://www.library.nashville.org/locations/loc\\_all.asp](http://www.library.nashville.org/locations/loc_all.asp). Call 615-862-5782 if you have questions or would like to schedule a research appointment. The architectural plans for select buildings, such as Scarritt College and Fisk University, were prioritized for processing while a number of the plans for this collection remain unprocessed and are identified as such in the building list below. Arrangements may be made for researchers to view the architectural plans, based on interest, staff availability, and condition of the plans. Please inquire in advance of visiting the Special Collections Division as the oversized nature of these materials typically requires special preparations to be made by staff.

**Restrictions on Use and Reproduction:**

Researchers should be aware that Nashville Public Library is not equipped to scan or reproduce copies of oversized materials at this time. Requests for scans or reproductions of available plans or other oversized items within the collection will be addressed on a case-by-case basis and reviewed by the division manager.

**Index Terms**

**Personal Names:**

Hibbs, Henry C. (Henry Closson), 1882-1949  
Hall, W. Terrill (William Terrill), d. 1950  
Parrent, H. Clinton, Jr., d. 1967  
Douglas, Aaron  
Bennett, Belle Harris, 1852-1922  
Cunningham, Jesse Lee, 1870-1950  
Diehl, Charles E. (Charles Edward), 1875-1964  
Johnson, Charles Spurgeon, 1893-1956  
Jones, Thomas Elsa  
Wightman, Maria Dyer Davies, b. 1833

**Corporate Names/Organizations/Government Bodies:**

American Institute of Architects  
Coffee House Club (Nashville, Tenn.)  
Davidson College  
Davidson College—Buildings  
Day and Klauder  
Fisk University  
Fisk University—Buildings  
Fort Gillem (Tenn.)  
Fort Sill (Tenn.)  
Galloway College (Searcy, Ark.)—Buildings  
Old Oak Club (Nashville, Tenn.)

George Peabody College for Teachers  
George Peabody College for Teachers—Buildings  
Hendrix College—Buildings  
Mary Baldwin College—Buildings  
Scarritt College for Christian Workers  
Scarritt College for Christian Workers—Buildings  
Southwestern College (Memphis, Tenn.)  
Southwestern College (Memphis, Tenn.)—Buildings  
University of Pennsylvania—Students—History  
University of South Carolina  
University of South Carolina—Buildings  
University of Tulsa  
University of Tulsa—Buildings  
Vanderbilt University  
Vanderbilt University—Buildings

**Conference Names:**

Southern Architectural and Industrial Arts Exposition (1929 : Memphis, Tenn.), sponsored by the American Institute of Architects, Southern Chapters

**Subjects:**

Architecture—Tennessee—Nashville  
Architecture, Gothic—Tennessee—Nashville  
Architects—Tennessee—Nashville  
Architectural firms—Tennessee—Nashville  
Architectural offices—Tennessee—Nashville  
Dedication services—Tennessee—Nashville  
Buildings—Tennessee—Nashville  
Buildings—Additions—Tennessee—Nashville  
Building construction—Tennessee—Nashville  
Dwellings—Tennessee—Nashville  
Architecture, Domestic—Tennessee—Nashville  
School facilities—Tennessee—Nashville  
College facilities—Tennessee—Nashville  
Public buildings—Tennessee—Nashville  
Municipal buildings—Tennessee—Nashville  
Hospitals—Tennessee—Nashville  
Hospital architecture—Tennessee—Nashville  
Hospitals—Tennessee—Memphis  
Religious facilities—Tennessee—Nashville  
Churches—Tennessee  
Churches—Kentucky  
Church architecture—Tennessee—Nashville  
Church buildings—Tennessee—Nashville  
Businesspeople—Tennessee—Nashville

Business enterprises—Tennessee--Nashville  
City and town life—Tennessee—Nashville  
Electric utilities—Tennessee—Nashville  
Campus planning—History—Sources  
Men—Societies and Clubs—Tennessee—Nashville  
Professional associations—Tennessee  
Young Men's Christian Associations—Association colleges (Nashville)

**Places:**

Tennessee—Buildings, structures, etc.  
Nashville (Tenn.)—Buildings, structures, etc.  
Nashville (Tenn.)—History—Sources  
Nashville (Tenn.)—History—20<sup>th</sup> century—Sources  
Memphis (Tenn.)—Buildings, structures, etc.  
Tennessee—History—Civil War, 1861-1865  
Davidson (N.C.)—Buildings, structures, etc.  
Columbia (S.C.)—Buildings, structures, etc.  
Conway (Ark.)—Buildings, structures, etc.  
Searcy (Ark.)—Buildings, structures, etc.  
Juiz de Fora (Brazil)--Buildings, structures, etc.  
Tulsa (Okla.)—Buildings, structures, etc.  
Nashville (Tenn.)—Societies, etc.  
Staunton (Va.)—Buildings, structures, etc.  
Westfield (N.J.)—Buildings, structures, etc.

**Genre/Document Types:**

Architectural drawings, aat  
Correspondence, aat  
Financial records, aat  
Lantern slides, aat  
Manuscripts, aat  
Photographs, aat  
Plans (Drawings), aat  
Negatives, aat

**Occupations:**

Architects  
Architects—Tennessee—Nashville

**Administrative Information**

**Copyright:** Copyright of materials created by Henry C. Hibbs was deeded to the Nashville Public Library by the donor at the time of acquisition; however, this collection contains numerous materials (ex. photographs) for which the copyright status is undetermined.

**Preferred Citation:** Henry C. Hibbs Papers, Special Collections Division, Nashville Public Library.

**Immediate Source of Acquisition:** Gift of Harriet Hall Cates, 2002-2004.

**Donor Information:** The Henry C. Hibbs Papers were donated to the Nashville Public Library from February 2002 to March 2004 by Harriet Hall Cates, A.I.A., and granddaughter of Mr. Hibbs.

**Processing Information:** Processing work began in May 2003. All materials except for some architectural plans and drawings were fully processed as of January 2007 by Tracey Howerton, with oversight by Linda Barnickel and assistance by volunteers Marty O'Reilly, Rose Mary Dorris Reed, Raymond Proctor and Evviva Weinraub. It should be noted that none of the architectural plans for this collection were deacidified or chemically treated for conservation purposes; however, they are stored in the best environment our facility permits.

**Accruals:** An addition to the collection was made in April, 2010. The items came to Nashville Public Library by way of the donor and the Tennessee State Library and Archives.

### Electronic Location and Access

|                                        |                                                                                                                                         |
|----------------------------------------|-----------------------------------------------------------------------------------------------------------------------------------------|
| Davidson College                       | <a href="http://www.davidson.edu/">http://www.davidson.edu/</a>                                                                         |
| Rhodes College (formerly Southwestern) | <a href="http://www.rhodes.edu/buildings">http://www.rhodes.edu/buildings</a>                                                           |
| Scarritt Bennett                       | <a href="http://www.scarrittbennett.org/">http://www.scarrittbennett.org/</a>                                                           |
| University of Pennsylvania             | <a href="http://www.archives.upenn.edu/histy/people/">http://www.archives.upenn.edu/histy/people/</a>                                   |
| University of South Carolina           | <a href="http://www.cla.sc.edu/MCKS/index.html">http://www.cla.sc.edu/MCKS/index.html</a>                                               |
| Vanderbilt University                  | <a href="http://www.vanderbilt.edu/News/register/Dec11_00/story1.html">http://www.vanderbilt.edu/News/register/Dec11_00/story1.html</a> |

### References to Works by or about Collection Creator/Topic

*Architects in Tennessee until 1930: A Dictionary* by Joseph L. Herndon, Masters thesis in Historic Preservation, Columbia University, 1975.

*Building of Nashville* by Wilbur Foster Creighton, 1975.

*Chancellors, Commodores, and Coeds: a History of Vanderbilt University* by Bill Carey, Clearbrook Press Publishing, 2003.

*Henry C. Hibbs, FAIA: Nashville Architect and Architecture* by W. Terrill Hall, AIA, April 11, 1983.

*Nashville in the New South, 1880-1930* by Don. H. Doyle, University of Tennessee Press, Knoxville, 1985.

*Negro Library Conference, Fisk University, Nashville, Tennessee, November 20-23, 1931 [sic 1930]*, Fisk University, 1930.

*Proceedings of the semi-centennial of Vanderbilt University, celebrated during the four days, October 15 to October 18, 1925, at Nashville, Tennessee, 1875-1925.*  
Bulletin of Vanderbilt University, Vol. 26, Number 3, April 1926.

*Tennessee Encyclopedia of History and Culture*, Carrol Van West, editor-in-chief,  
Nashville, Tenn.: Tennessee Historical Society: Rutledge Hill Press, 1998

*The Vanderbilt Campus: A Pictorial History* by Robert A. McGaw, Vanderbilt  
University Press, Nashville, 1978.

## DETAILED DESCRIPTION OF THE COLLECTION

### SERIES I. – BUILDINGS, 1911-1983, MULTIPLE FORMATS AND BOXES

**Series Abstract/Description:** Series I consists of documents, photographs, negatives, oversize materials, a few lantern slides and architectural plans. Most buildings were either designed or added on to by Hibbs and his various firms (c. 1911-c. 1950), or by his son-in-law, W. Terrill Hall (post-1950). For a few buildings, the relationship to Hibbs was unclear.

**Arrangement:** The bulk of Series I materials (documents, photographs, negatives, and smaller size plans) are grouped by format and then are arranged alphabetically within the format. Within a container, materials are arranged alphabetically by building name or by identifier found on original files at time of processing, and then are numbered within the building name.

The exceptions are the oversize materials, lantern slides and architectural plans. The oversize materials are housed in two oversize boxes. Oversize Box 1 contains loose items that are foldered separately and numbered. Oversize Box 2 contains Hibbs' portfolio of photographs representing his exhibit for the 1929 architectural exposition in Memphis. The lantern slides are housed separately in eight boxes, are grouped as they were originally found, and are numbered consecutively within these groupings. The majority of architectural plans are stored flat in map case drawers – they are arranged within the drawer primarily by size and also by condition in some cases. **A number of architectural plans remain unprocessed and are stored either in document cases (Closed Stacks Workroom, Range 4, Section 1 – top shelf) or rolled storage boxes (Map Storage Room, shelf 14).** Patrons wishing to view architectural plans should be cautioned that these materials often require special handling and arrangements.

---

#### Container List—Series I:

| <i>Building</i>                      | <i>Container/s</i>  | <i>Description</i>                                          |
|--------------------------------------|---------------------|-------------------------------------------------------------|
| <b>American National Bank</b>        |                     |                                                             |
| Photographs                          | Box 1, Photo 1      | Exterior, c. 1920's                                         |
| Plans                                | Drawer 17, Folder 1 | Stahlman Building, Alterations & Additions to, c. 1919-1920 |
|                                      | Folder 2            | Broad Street, Union Street, c. 1919                         |
| <b>American Trust Building</b>       |                     |                                                             |
| Documents                            | Box 1, Folder 1     | Specifications, Job Notes, 1925                             |
|                                      | Folder 2            | Contract Agreement, 1925-1926                               |
| Photographs                          | Box 1, Photo 1      | Exterior, c. 1925                                           |
| <b>Andrew Price Methodist Church</b> |                     |                                                             |
| Documents                            | Box 1, Folder 1     | Correspondence, 1988                                        |

|             |                   |                   |
|-------------|-------------------|-------------------|
| Photographs | Box 1, Photo 1    | Exterior, c. 1958 |
| Negatives   | Box 1, Negative 1 | Same as Photo 1   |

#### **Belmont Methodist Church**

|             |                      |                                                 |
|-------------|----------------------|-------------------------------------------------|
| Documents   | Box 1, Folder 1      | Building Committees                             |
| Photographs | Box 1, Photos 1-20   | Exterior, Interior, c. late 1940's-1950's       |
| Negatives   | Box 1, Negatives 1-4 | Two match to photos, two do not.                |
| Plans       | Box 1, Folder 1-2    | Proposed educational building addition, c. 1951 |

#### **Bennett Memorial Methodist Church, Henderson, KY**

|             |                   |                            |
|-------------|-------------------|----------------------------|
| Documents   | Box 1, Folder 1   | Job Notes, n.d.            |
| Photographs | Box 1, Photo 1    | Exterior                   |
| Negatives   | Box 1, Negative 1 | Same as Photo 1            |
| Plans       | Box 1, Folder 1   | Proposed addition, c. 1962 |

#### **Blakemore Methodist Church, South**

|       |                       |         |
|-------|-----------------------|---------|
| Plans | Drawer 6, Folders 1-2 | c. 1923 |
|-------|-----------------------|---------|

#### **Broadway Methodist Church, Bowling Green, KY**

|       |                 |                  |
|-------|-----------------|------------------|
| Plans | Box 1, Folder 4 | Addition c. 1952 |
|-------|-----------------|------------------|

#### **Caldwell, Rogers C., Esq., A House for**

|       |                    |         |
|-------|--------------------|---------|
| Plans | Drawer 8, Folder 1 | c. 1916 |
|-------|--------------------|---------|

#### **Calvary Methodist Church**

|             |                |                 |
|-------------|----------------|-----------------|
| Photographs | Box 1, Photo 1 | News clip, 1945 |
|-------------|----------------|-----------------|

#### **Capitol Annex and Memorial Hall**

|           |                 |                 |
|-----------|-----------------|-----------------|
| Documents | Box 1, Folder 1 | Job Notes, n.d. |
|-----------|-----------------|-----------------|

#### **Central State Hospital**

|             |                      |                                           |
|-------------|----------------------|-------------------------------------------|
| Documents   | Box 1, Folder 1      | Article re: Project, 1950                 |
| Photographs | Box 1, Photos 1-23   | Construction, Exterior, Interior, c. 1949 |
| Negatives   | Box 1, Negatives 1-6 | All match to Photos 1-6                   |
| Plans       | Drawer 7, Folder 1   | Alterations, n.d.                         |

#### **City Market House**

|             |                   |                                  |
|-------------|-------------------|----------------------------------|
| Documents   | Box 1, Folder 1   | Article, 1937                    |
| Photographs | Box 1, Photos 1-3 | Exterior, Interior, c. 1937-1938 |

#### **Clover Bottom Home**

|             |                   |                                            |
|-------------|-------------------|--------------------------------------------|
| Photographs | Box 1, Photos 1-9 | Personnel Dorm—Exterior, Interior, c. 1956 |
|-------------|-------------------|--------------------------------------------|

|                                                               |                                                                            |                                                                                                                                                                                               |
|---------------------------------------------------------------|----------------------------------------------------------------------------|-----------------------------------------------------------------------------------------------------------------------------------------------------------------------------------------------|
| Negatives                                                     | Box 1, Negatives 1-3                                                       | Match to Photos 1-3                                                                                                                                                                           |
| <b>Cole, Philip, Residence</b>                                |                                                                            |                                                                                                                                                                                               |
| Plans                                                         | Drawer 8, Folders 1-3                                                      | c. 1922                                                                                                                                                                                       |
| <b>Columbia Methodist Church, Columbia, KY</b>                |                                                                            |                                                                                                                                                                                               |
| Negatives                                                     | Box 1, Negative 1                                                          | Exterior rendering, c. 1962                                                                                                                                                                   |
| <b>Concordia Lutheran Church</b>                              |                                                                            |                                                                                                                                                                                               |
| Negatives                                                     | Box 1, Negatives 1-2                                                       | Rendering c. 1953, exterior photo                                                                                                                                                             |
| <b>Cooper Funeral Home</b>                                    |                                                                            |                                                                                                                                                                                               |
| Documents                                                     | Box 1, Folder 1                                                            | Job Notes, Sketches, c. 1947[?]                                                                                                                                                               |
| Plans                                                         | Drawer 10, Folder 1                                                        | Sketches for, n.d.                                                                                                                                                                            |
| <b>Cornell University, Boldt Hall, Building E, Ithaca, NY</b> |                                                                            |                                                                                                                                                                                               |
| Plans                                                         | Drawer 16, Folder 1                                                        | Architects Day & Klauder, c. 1922<br>(3 items)                                                                                                                                                |
| <b>Creighton, Wilbur, Residence, [ 1505 ] Eastland Avenue</b> |                                                                            |                                                                                                                                                                                               |
| Plans                                                         | Drawer 8, Folders 1-2                                                      | c. 1920                                                                                                                                                                                       |
| <b>Cumberland High School</b>                                 |                                                                            |                                                                                                                                                                                               |
| Negatives                                                     | Box 1, Negative 1                                                          | Rendering of new gym & cafeteria c. 1951.                                                                                                                                                     |
| <b>Curley Printing Company</b>                                |                                                                            |                                                                                                                                                                                               |
| Plans                                                         | Box 1, Folder 5                                                            | Proposed plant on Cowan Street, c. 1968                                                                                                                                                       |
| <b>Davidson College, Davidson, NC</b>                         |                                                                            |                                                                                                                                                                                               |
| Documents                                                     | Box 1, Folder 1                                                            | Chambers Building—Campus Map, Articles, 1915-1942                                                                                                                                             |
| Photographs                                                   | Box 2, Photos 1-34                                                         | Exterior, Interior, c. 1931-1940                                                                                                                                                              |
| Negatives                                                     | Box 1, Negatives 1-6                                                       | Only one neg. matches to photos                                                                                                                                                               |
| Lantern Slides                                                | Box 2, Slide 9<br>Box 3, Slide 15<br>Box 8, Slide 56                       | Chambers Building—rendering<br>Chambers Building<br>Chambers Building—negative image                                                                                                          |
| Plans                                                         | Drawer 1<br>Folders 1-3<br>Folders 1-2<br>Folder 1<br>Folder 1<br>Folder 1 | Library [Chambers], Prelims, All but Finals, c. 1937-1940<br>Science Building, Prelims, c. 1940<br>Aerial Map of Campus, [c. 1926?]<br>Grounds, c. 1922<br>Richardson Athletic Field, c. 1923 |

**Davis, Mrs. Paul M., Residence**

|             |                |                |
|-------------|----------------|----------------|
| Photographs | Box 1, Photo 1 | Exterior, 1949 |
|-------------|----------------|----------------|

**Disciples of Christ Divinity House, 20<sup>th</sup> Ave. South and Adelia Ave.**

|             |                   |                     |
|-------------|-------------------|---------------------|
| Documents   | Box 1, Folder 1   | Article, 1957       |
| Photographs | Box 2, Photos 1-7 | Exterior, c. 1947   |
| Negatives   | Box 1, Negative 1 | Matches Photo 7     |
| Plans       | Box 1, Folder 6   | Plot plans, c. 1957 |

**Downtown 5<sup>th</sup> and Church [ W. H. Jackson Building, Joseph Frank & Sons ]**

|             |                |                   |
|-------------|----------------|-------------------|
| Photographs | Box 2, Photo 1 | Exterior, c. 1928 |
|-------------|----------------|-------------------|

**Dresslar, Dr. F. B., Blakemore Avenue**

|       |                    |      |
|-------|--------------------|------|
| Plans | Drawer 8, Folder 1 | n.d. |
|-------|--------------------|------|

**East End M. E. Church, 13<sup>th</sup> and Holly Streets**

|       |                     |                                                                                                                                                          |
|-------|---------------------|----------------------------------------------------------------------------------------------------------------------------------------------------------|
| Plans | Drawer 6, Folders 1 | Alterations & Additions to, n.d.<br>[Note: Plans are undated. Likely c. 1923 as they were originally grouped with plans for Blakemore Methodist Church ] |
|-------|---------------------|----------------------------------------------------------------------------------------------------------------------------------------------------------|

**Eastminster Presbyterian Church**

|             |                   |                                 |
|-------------|-------------------|---------------------------------|
| Documents   | Box 1, Folder 1   | Job Notes, 1963                 |
| Photographs | Box 2, Photos 1-7 | Exterior, c. 1963-1964          |
| Plans       | Box 1, Folder 7   | Proposed new education building |

**Edgefield Lodge**

|           |                   |                 |
|-----------|-------------------|-----------------|
| Negatives | Box 1, Negative 1 | Rendering, n.d. |
|-----------|-------------------|-----------------|

**Ewing, Mrs. Cecil, Residence for**

|       |                    |         |
|-------|--------------------|---------|
| Plans | Drawer 8, Folder 1 | c. 1929 |
|-------|--------------------|---------|

**Fire Hall No. 8**

|           |                   |                 |
|-----------|-------------------|-----------------|
| Negatives | Box 1, Negative 1 | Rendering, n.d. |
|-----------|-------------------|-----------------|

**First Christian Church, Shelbyville, TN**

|           |                   |                   |
|-----------|-------------------|-------------------|
| Negatives | Box 1, Negative 1 | Rendering c. 1960 |
|-----------|-------------------|-------------------|

**First Methodist Church, Hopkinsville, KY**

|             |                   |                      |
|-------------|-------------------|----------------------|
| Photographs | Box 2, Photos 1-3 | Exterior             |
| Plans       | Box 1, Folder 8   | Educational building |

**First Methodist Church, Madisonville, KY**

|                                                            |                       |                                                                                                      |
|------------------------------------------------------------|-----------------------|------------------------------------------------------------------------------------------------------|
| Negatives                                                  | Box 1, Negative 1     | Rendering                                                                                            |
| <b>First Methodist Church, Columbia, TN</b>                |                       |                                                                                                      |
| Photographs                                                | Box 2, Photos 1-5     | Exterior, Interior, c. 1963                                                                          |
| <b>First Methodist Church, Shelbyville, TN</b>             |                       |                                                                                                      |
| Documents                                                  | Box 1, Folder 1       | Job Notes, 1955-1956                                                                                 |
| Negatives                                                  | Box 1, Negatives 1-2  | Renderings c. 1952, 1954                                                                             |
| Plans                                                      | Drawer 10, Folder 1-3 | c. 1956                                                                                              |
| <b>First Presbyterian Church (Fifth and Church)</b>        |                       |                                                                                                      |
| Documents                                                  | Box 1, Folder 1       | Dedication Program for New Church House & Sunday School Building, 1919                               |
|                                                            | Folder 2              | Sketches, Notes re: Alterations, c. 1947                                                             |
| Photographs                                                | Box 2, Photos 1-4     | Addition Exterior, c. 1917-1919                                                                      |
| Plans                                                      | Drawer 6, Folders 1-3 | Revision, Alteration to Choir Loft, c. 1946-47                                                       |
| <b>First Savings Bank &amp; Trust Co. (617 Church St.)</b> |                       |                                                                                                      |
| Plans                                                      | Drawer 17, Folder 1   | c. May 1919                                                                                          |
| <b>Fisk University</b>                                     |                       |                                                                                                      |
| Documents                                                  | Box 1, Folder 1       | Report to Board of Trustees, 1929                                                                    |
|                                                            | Folder 2              | Articles, n.d.                                                                                       |
|                                                            | Folder 3              | Articles, n.d.                                                                                       |
|                                                            | Folder 4              | Publications, c. 1930-1936                                                                           |
|                                                            | Folder 5              | 505, 507 16 <sup>th</sup> Ave. North—Job Notes re: Alterations, n.d.                                 |
|                                                            | Folder 6              | Laundry Building—Job Notes, 1920                                                                     |
|                                                            | Folder 7              | Building Notes, 1953                                                                                 |
| Photographs                                                | Box 2, Photos 1-19    | Library—Exterior, Interior, c. 1930                                                                  |
| Negatives                                                  | Box 1, Negatives 1-8  | Schematics of possible tower views for Library Building                                              |
| Oversize                                                   | Box 1, Folder 6       | News article feature, “Fisk Library Dedicated,” <u>Nashville Banner</u> , Nov. 30, 1930              |
|                                                            | Box 2, Photo 3        | Library Building (similar to Photo #4)                                                               |
| Plans                                                      | Drawers 2-3           | Library Building – see Appendix A (est. 80 plans)                                                    |
|                                                            | Drawer 4              | Fisk – all other buildings – See Appendix A (est. 45+ plans) – includes Plat Map of Properties, n.d. |

**[IMPORTANT: Fort Gillem site is identified on this plat map! See map folder for details.]**

**Flippen, H. E., Residence**

|                     |                 |                |
|---------------------|-----------------|----------------|
| Photographs         | Box 2, Photos 1 | Exterior, 1937 |
| Plans (unprocessed) | Box 1, Folder 1 | c. 1937        |

**Follin, Webb, Jr., Residence**

|                     |                 |                             |
|---------------------|-----------------|-----------------------------|
| Documents           | Box 1, Folder 1 | Correspondence, Notes, 1955 |
| Plans (unprocessed) | Box 1, Folder 1 | c. 1955                     |

**Foster, C. C., Residence**

|                     |                 |                                        |
|---------------------|-----------------|----------------------------------------|
| Plans (unprocessed) | Box 1, Folder 1 | Hillsboro Rd. and Abbott Lane, c. 1933 |
|---------------------|-----------------|----------------------------------------|

**Fourth & First National Bank (617 Church St.)**

|       |                     |         |
|-------|---------------------|---------|
| Plans | Drawer 17, Folder 1 | c. 1919 |
|-------|---------------------|---------|

**Franklin, Tennessee, Plan for Office Bldg.**

|                     |                 |         |
|---------------------|-----------------|---------|
| Plans (unprocessed) | Box 1, Folder 1 | c. 1926 |
|---------------------|-----------------|---------|

**Galloway College, Little Rock and Searcy, AR**

|                     |                   |                                                |
|---------------------|-------------------|------------------------------------------------|
| Documents           | Box 1, Folder 1   | Notes, n.d.                                    |
| Photographs         | Box 3, Photos 1-2 | Exterior                                       |
| Plans (unprocessed) | Box 1, Folder 1   | Temporary science building, plot plan, c. 1922 |
|                     | Folder 2-3        | Science building, c. 1924                      |

**Gerard, Eugene, Mortuary, Bowling Green, KY**

|       |                 |      |
|-------|-----------------|------|
| Plans | Box 1, Folder 9 | n.d. |
|-------|-----------------|------|

**Glen Leven Church**

|           |                   |                               |
|-----------|-------------------|-------------------------------|
| Negatives | Box 1, Negative 1 | Aerial view rendering c. 1962 |
|-----------|-------------------|-------------------------------|

**Glendale United Methodist Church**

|       |                    |         |
|-------|--------------------|---------|
| Plans | Drawer 6, Folder 1 | c. 1951 |
|-------|--------------------|---------|

**Gothic Design & Details**

|       |                  |                                                                       |
|-------|------------------|-----------------------------------------------------------------------|
| Plans | Box 1, Folder 10 | Detail of gutter screen, pos. used for Scarritt or other bldgs., n.d. |
|-------|------------------|-----------------------------------------------------------------------|

**Granberry College, Juiz de Fora, Brazil**

|                                                   |       |                                          |
|---------------------------------------------------|-------|------------------------------------------|
| Plans (unprocessed - rolled - Map Room, Shelf 14) |       |                                          |
|                                                   | Box 1 | Main Building (Edificio Principal), 1922 |
|                                                   | Box 2 | Dormitory (Dormitorio), 1922             |

**Greenville Methodist Church, Greenville, KY**

|             |                   |                                                             |
|-------------|-------------------|-------------------------------------------------------------|
| Documents   | Box 1, Folder 1   | Article, Notes, 1963                                        |
| Photographs | Box 3, Photos 1-9 | Exterior, Interior                                          |
| Negatives   | Box 1, Negative 1 | Matches Photos 3, 9                                         |
| Plans       | Box 1, Folder 11  | Proposed education bldg and alterations to auditorium, n.d. |

**Hall, W. Terrill**

|                     |                 |                                              |
|---------------------|-----------------|----------------------------------------------|
| Plans (unprocessed) | Box 1, Folder 1 | Garage, Car Port and End Tables for, c. 1953 |
|---------------------|-----------------|----------------------------------------------|

**Hardware, Wrought Iron**

|                     |                 |                                                                |
|---------------------|-----------------|----------------------------------------------------------------|
| Plans (unprocessed) | Box 1, Folder 1 | Door knocker, door pull, ring pull, hinge plate, c. 1926, 1929 |
|---------------------|-----------------|----------------------------------------------------------------|

**Haywood Hills Baptist Church**

|             |                   |                    |
|-------------|-------------------|--------------------|
| Documents   | Box 1, Folder 1   | Article, 1962-1963 |
| Photographs | Box 3, Photos 1-6 | Exterior, 1963     |

**Hendley, J. O., Residence**

|                     |                   |                                      |
|---------------------|-------------------|--------------------------------------|
| Documents           | Box 1, Folder 1   | Specifications, Plumbing, c. 1930[?] |
| Photographs         | Box 3, Photos 1-3 | Exterior, c. 1930                    |
| Plans (unprocessed) | Box 1, Folder 1   | n.d.                                 |

**Hendrix College, Conway, AR**

|                                                   |             |                 |
|---------------------------------------------------|-------------|-----------------|
| Plans (unprocessed - rolled - Map Room, Shelf 14) | Boxes 1 & 2 | Gymnasium, n.d. |
|---------------------------------------------------|-------------|-----------------|

**Hibbs Apartment**

|                     |                 |      |
|---------------------|-----------------|------|
| Plans (unprocessed) | Box 1, Folder 1 | n.d. |
|---------------------|-----------------|------|

**Hibbs, Henry C., House for**

|                     |                 |                                          |
|---------------------|-----------------|------------------------------------------|
| Plans (unprocessed) | Box 1, Folder 1 | Westfield, N.J., n.d. [ <b>FRAGILE</b> ] |
|---------------------|-----------------|------------------------------------------|

**Hibbs, Henry C., Proposed Residence**

|                     |                 |      |
|---------------------|-----------------|------|
| Plans (unprocessed) | Box 1, Folder 1 | n.d. |
|---------------------|-----------------|------|

**Hibbs Residence**

|           |                 |                                         |
|-----------|-----------------|-----------------------------------------|
| Documents | Box 1, Folder 1 | Alterations—Correspondence, c.1947-1948 |
|-----------|-----------------|-----------------------------------------|

**Hibbs Residence**

|                     |                 |                                   |
|---------------------|-----------------|-----------------------------------|
| Plans (unprocessed) | Box 1, Folder 1 | Alterations & new materials, n.d. |
|---------------------|-----------------|-----------------------------------|

**Hibbs Residence**

|                                                               |                       |                                                                                                                |
|---------------------------------------------------------------|-----------------------|----------------------------------------------------------------------------------------------------------------|
| Plans (unprocessed)                                           | Box 1, Folder 1       | 1804 18 <sup>th</sup> Avenue South—lawn chair, outdoor grill, bird bath & fish pool, c. 1946                   |
| <b>Hillsboro Road, A House to Be Built on</b>                 |                       |                                                                                                                |
| Plans                                                         | Drawer 17, Folder 1   | March 1919                                                                                                     |
| <b>Hobbs, George, Residence</b>                               |                       |                                                                                                                |
| Negatives                                                     | Box 1, Negatives 1-5  | Views of home and property, c. 1963                                                                            |
| Plans (unprocessed)                                           | Box 1, Folder 1       | Proposed addition to the residence of, c. 1952                                                                 |
| <b>Inglewood Presbyterian Church</b>                          |                       |                                                                                                                |
| Documents                                                     | Box 1, Folder 1       | Article, 1952                                                                                                  |
| Photographs                                                   | Box 3, Photo 1        | Addition—Exterior, c. 1962                                                                                     |
| Negatives                                                     | Box 1, Negative 1     | Matches Photo 1                                                                                                |
| Plans                                                         | Box 1, Folder 12      | Educational bldg, c. 1962                                                                                      |
| Plans (unprocessed)                                           | Box 2, Folder 1       | McGavock Road—Proposed Addition, c. 1953                                                                       |
| <b>Jewish Temple, Fifth Avenue, North of Ryman Auditorium</b> |                       |                                                                                                                |
| Documents                                                     | Box 1, Folder 1       | Job Notes, Sketches, c. 1946                                                                                   |
| Plans                                                         | Drawer 6, Folder 1    | Drawing – “Plot of” – 1 item showing small drawings of basement, main floor and front elevation plans, c. 1946 |
| <b>Kennedy General Hospital</b>                               |                       |                                                                                                                |
| Documents                                                     | Box 1, Folder 1       | Dedication Program, Article, 1943                                                                              |
| Photographs                                                   | Box 3, Photos 1-2     | Exterior, c. 1943                                                                                              |
| <b>Kirkland, Chancellor and Mrs., Residence</b>               |                       |                                                                                                                |
| Plans                                                         | Drawer 8, Folders 1-3 | Includes Plat Map of the Highlands of Belle Meade, c. 1928                                                     |
| <b>Kroger Co. Building, Russellville, KY</b>                  |                       |                                                                                                                |
| Plans                                                         | Drawer 10, Folder 1   | c. 1954                                                                                                        |
| <b>Lindsey Wilson College, Columbia, KY</b>                   |                       |                                                                                                                |
| Photographs                                                   | Box 3, Photo 1        | Student Union Building—Exterior, c. 1960                                                                       |
| <b>Livingston, Professor George, A House for</b>              |                       |                                                                                                                |
| Plans (unprocessed)                                           | Box 2, Folder 1       | c. 1918                                                                                                        |
| <b>E. T. Lowe Publishing Co., Sidco Drive</b>                 |                       |                                                                                                                |

|                                                   |                     |                                              |
|---------------------------------------------------|---------------------|----------------------------------------------|
| Negatives                                         | Box 1, Negative 1   | Rendering, c. 1956                           |
| Plans                                             | Box 1, Folder 13    | Notes, diagram of job, plan, n.d.            |
| <b>Lucy Holt Moore Center</b>                     |                     |                                              |
| Documents                                         | Box 1, Folder 1     | News clip, 1946                              |
| <b>Lynde, W. R., Esq., Westfield, NJ</b>          |                     |                                              |
| Plans (unprocessed)                               | Box 2, Folder 1     | n.d. [ <b>FRAGILE</b> ]                      |
| <b>Martin, Bracey &amp; Welsh Mortuary</b>        |                     |                                              |
| Plans (unprocessed)                               | Box 2, Folder 1     | c. 1936                                      |
| <b>Martin College, Pulaski, TN</b>                |                     |                                              |
| Documents                                         | Box 1, Folder 1     | Notes, 1950                                  |
| Plans (unprocessed)                               | Box 2, Folder 1     | c. 1949-1950                                 |
| <b>Mary Baldwin College, Staunton, VA</b>         |                     |                                              |
| Plans (unprocessed - rolled - Map Room, Shelf 14) |                     |                                              |
|                                                   | Boxes 1 & 2         | Physical Education Building, c. 1941         |
| <b>Mausoleum for Hopkinsville, KY</b>             |                     |                                              |
| Plans                                             | Drawer 10, Folder 1 | n.d.                                         |
| <b>Maxwell House Hotel</b>                        |                     |                                              |
| Photographs                                       | Box 3, Photo 1      | Interior, c. 1920's                          |
| <b>Mayfield High School, Mayfield, KY</b>         |                     |                                              |
| Plans (unprocessed)                               | Box 2, Folder 1     | n.d.                                         |
| <b>[McClain, Bill, Residence?]</b>                |                     |                                              |
| Plans (unprocessed)                               | Box 2, Folder 1     | Unidentified, c. 1954—See envelope in folder |
| <b>Dr. Carl S. McMurray Clinic</b>                |                     |                                              |
| Documents                                         | Box 1, Folder 1     | Correspondence, Notes, 1947                  |
| Plans (unprocessed)                               | Box 2, Folder 1     | c. 1946                                      |
|                                                   | Folder 2            | c. 1946                                      |
| <b>McQuiddy Printing Co.</b>                      |                     |                                              |
| Documents                                         | Box 1, Folder 1     | Notes, 1926                                  |
| Plans (unprocessed)                               | Box 3, Folder 1-6   | c. 1923                                      |
| <b>Memorial Lutheran Church</b>                   |                     |                                              |
| Photographs                                       | Box 3, Photo 1      | Exterior, c. 1983                            |
| <b>Mensler Hall (Harwood?)</b>                    |                     |                                              |

|                                               |                       |                                                                                                                                                            |
|-----------------------------------------------|-----------------------|------------------------------------------------------------------------------------------------------------------------------------------------------------|
| Negatives                                     | Box 1, Negative 1     | Rendering, c. 1960                                                                                                                                         |
| <b>Methodist Church Board of Education</b>    |                       |                                                                                                                                                            |
| Photographs                                   | Box 3, Photo 1        | Exterior, c. 1950                                                                                                                                          |
| <b>Methodist Church, Loretto, TN</b>          |                       |                                                                                                                                                            |
| Plans                                         | Drawer 10, Folder 1   | c. 1953                                                                                                                                                    |
| <b>Monroe Harding Administration Building</b> |                       |                                                                                                                                                            |
| Documents                                     | Box 1, Folder 1       | News clip, c. 1935                                                                                                                                         |
| <b>Moore, Lucy Holt, Recreation Center</b>    |                       |                                                                                                                                                            |
| Plans (unprocessed)                           | Box 2, Folder 1       | c. 1948                                                                                                                                                    |
|                                               | Folder 2              | c. 1946-1948                                                                                                                                               |
| <b>Morrison, White Hall, Residence</b>        |                       |                                                                                                                                                            |
| Documents                                     | Box 1, Folder 1       | Correspondence, 1937                                                                                                                                       |
|                                               | Folder 2              | Samples, 1937                                                                                                                                              |
| Plans (unprocessed)                           | Box 3, Folder 1-2     | Lealand, c. 1937                                                                                                                                           |
| <b>Mrs. Grissom's Salads, Shelbyville, TN</b> |                       |                                                                                                                                                            |
| Negatives                                     | Box 1, Negatives 1-2  | Exterior, interior, c. 1952                                                                                                                                |
| <b>Municipal Auditorium</b>                   |                       |                                                                                                                                                            |
| Documents                                     | Box 1, Folder 1       | Article, Post Card, 1946                                                                                                                                   |
| Photographs                                   | Box 3, Photos 1-3     | Exterior                                                                                                                                                   |
| Oversize                                      | Box 1, Folder 4       | News article, front page, "City Auditorium, Plaza Plans Announced," <u>Nashville Banner</u> , Feb. 23, 1946                                                |
|                                               |                       | Report: <u>Site Studies – Auditorium and Civic Center</u> , Prepared for the Municipal Auditorium Commission by the City Planning Commission, January 1945 |
| <b>Napier School</b>                          |                       |                                                                                                                                                            |
| Documents                                     | Box 2, Folder 1       | Job Notes, 1946[?]                                                                                                                                         |
| Plans                                         | Drawer 7, Folders 1-2 | Proposed Addition to, c. 1946                                                                                                                              |
| <b>Nashville Electric Service (N.E.S.)</b>    |                       |                                                                                                                                                            |
| Documents                                     | Box 2, Folder 1       | Article, 1949                                                                                                                                              |
| Photographs                                   | Box 3, Photos 1-4     | Exterior, c. 1948, 1962                                                                                                                                    |
| Oversize                                      | Box 1, Folder 4       | News article, front page, "New NES                                                                                                                         |

Building Bids Opened," Nashville  
Tennessean, Nov. 2, 1942

**Nashville Synagogue [ not otherwise identified ]**

Plans                      Box 1, Folder 14              c. 1941

**Nashville Union Stockyards, Inc.**

Photographs              Box 3, Photo 1              Exterior, c. 1921

**Oakland Christian Church, Oakland, KY**

Documents              Box 2, Folder 1              Sketch, Notes, n.d.  
Plans                      Drawer 10, Folder 1              c. 1953

**Old Hickory Presbyterian Church**

Documents              Box 2, Folder 1              Job Notes, Suggestive  
                                                                                                 Church Plan, n.d.  
Plans                      Drawer 6, Folders 1-2              c. 1926

**Oliver, Dr. O. A., Residence for (on West End Near 38<sup>th</sup> Ave.)**

Plans                      Drawer 17, Folder 1              c. 1919  
                                                                                                 (6 items)

**Oman, John, Jr. Office of, and Crab Orchard Stone Company**

Photographs              Box 3, Photos 1-6              Exterior

**Palmer Residence, W.O. / Parmer Lot [ 110 Seventh Ave. N.]**

Documents              Box 2, Folder 1              Correspondence, n.d.  
Plans                      Drawer 17              c. 1922 – former downtown  
                                                                                                 residence, then site of McQuiddy  
                                                                                                 Printing as of 1923 – plot map shows  
                                                                                                 brick servant's house in rear corner  
                                                                                                 of lot and Cumberland Masonic  
                                                                                                 Lodge next door

**Parks and Recreation Department, Board of Park Commissioners Administration Building**

Negatives              Box 1, Negative 1              Rendering of Centennial Park  
                                                                                                 building, c. 1959

**Patch, Mr., Alterations to Residence for, Clarksville, TN**

Plans                      Drawer 10, Folder 1              c. 1924

**Peabody College**

Documents              Box 2, Folder 1              News Clip re: Two New Dorms, n.d.  
Photographs              Box 3, Photos 1-25              Exterior, c. 1914-1924

|                                                                  |                                |                                                                                                                                            |
|------------------------------------------------------------------|--------------------------------|--------------------------------------------------------------------------------------------------------------------------------------------|
| Oversize                                                         | Box 1, Folder 6                | Oversize panoramic image of First Summer Session, George Peabody College for Teachers, July 24, 1914                                       |
|                                                                  |                                | Artist's rendering of aerial view of campus and building reference map. Ludlow & Peabody Architects. Warren H. Manning, Landscape Designer |
| <b>Peabody Manor</b>                                             |                                |                                                                                                                                            |
| Photographs                                                      | Box 3, Photo 1                 | Wampler Apartment—Exterior                                                                                                                 |
| <b>Pherigo Residence, Donelson, TN</b>                           |                                |                                                                                                                                            |
| Plans (unprocessed)                                              | Box 3, Folder 1                | c. 1954                                                                                                                                    |
| <b>Phoenix Mutual Insurance Company, Stahlman Building</b>       |                                |                                                                                                                                            |
| Documents                                                        | Box 2, Folder 1                | Office Revisions, n.d.                                                                                                                     |
| Plans                                                            | Drawer 7, Folder 1             | Proposed Offices for Stahlman Building, c. 1952                                                                                            |
| <b>Potter, Edward, Residence [ Whitland and Bowling Avenues]</b> |                                |                                                                                                                                            |
| Plans                                                            | Drawer 17, Folder 1 (14 items) | c. 1921                                                                                                                                    |
|                                                                  | Folder 2 (5 items)             | c. 1921 – contents include watercolored drawings unique to the collection.                                                                 |
|                                                                  | Folder 3 (4 items)             |                                                                                                                                            |
|                                                                  | Box 2, Folders 1-14            | Contents include watercolored drawings unique to the collection.                                                                           |
| <b>Powell, R. L., Auto Shop (1525 Demonbreun)</b>                |                                |                                                                                                                                            |
| Plans                                                            | Drawer 7, Folders 1-2          | n.d. [c. 1940's or 1950's?]                                                                                                                |
| <b>Presbyterian Church, Bowling Green, KY</b>                    |                                |                                                                                                                                            |
| Negatives                                                        | Box 1, Negatives 1-2           | Renderings c. 1952                                                                                                                         |
| <b>Presidential / Civic Plaza</b>                                |                                |                                                                                                                                            |
| Documents                                                        | Box 2, Folder 1                | Article, n.d.                                                                                                                              |
| <b>Queens College, Charlotte, N.C.</b>                           |                                |                                                                                                                                            |
| Plans (unprocessed)                                              | Box 3, Folder 1                | Fine Arts Building, c.1941                                                                                                                 |

**Ransom, Mrs. John C., Residence**

Plans (unprocessed) Box 3, Folder 1 Belle Meade, c. 1922

**Rawlings, Mrs. E. H., Residence**

Plans Drawer 17, Folder 1 c. Feb. 1915, shows maid's room in  
(11 items) basement plan, Hibbs' office  
location as Peabody campus

**Residences, Miscellaneous**

Plans Drawer 8, Folder 1 Harold Edwards—den, Nashville, n.d.  
Dr. & Mrs. O.L. Davis—addition to  
residence, Scottsville, KY, c.  
1955  
Mr. A. Battle Rodes—fireplace,  
Nashville, c. 1950  
Mr. & Mrs. Hilliard Wood—book  
case, [Nashville?], c. 1942

**Rodes, A.B., Residence**

Documents Box 2, Folder 1 Specifications for a Residence on  
Hood's Hill Road, n.d.

**John C. Roesch Mortuary**

Plans Box 1, Folder 15 n.d.

**Rosebank Elementary School**

Negatives Box 1, Negative 1 Rendering of building and  
grounds, c. 1952(?)  
Plans Drawer 7, Folders 1-2 c. 1953-1954

**Ryman Auditorium**

Documents Box 2, Folder 1 Notes, Drawings, City Building  
Laws, 1917, 1946  
Oversize Box 1, Folder 4 Diagram of Gallery Seats for Ryman  
Auditorium, Stage Diagram of First  
Floor Seats for Union Gospel  
Tabernacle  
Plans (unprocessed) Box 4, Folder 1 2 plans—non-detailed sketches of  
entrances, stairwells, and traffic  
lines, n.d.

**Scarritt College**

Documents Box 2, Folder 1 Scarritt Quarry, c. mid-late 1920's  
Folder 2 Brochure re: Building Plans, c. 1925-  
1926  
Folder 3 Articles, 1925-1937

|             |                                                                                                                              |                                                                                                                         |
|-------------|------------------------------------------------------------------------------------------------------------------------------|-------------------------------------------------------------------------------------------------------------------------|
|             | Folder 4                                                                                                                     | Brochures, Articles c. 1928- c. 1945                                                                                    |
|             | Folder 5                                                                                                                     | Other's Writings re: Hibbs and / or Scarritt College, 1927-?                                                            |
|             | Folder 6                                                                                                                     | Journal, <i>Southern Architect and Building News</i> , feature on Hibbs and Scarritt, September 1928                    |
|             | Folder 7                                                                                                                     | Journal, <i>Southern Architect and Building News</i> , feature on South's First Architectural Exposition, December 1929 |
|             | Folder 8                                                                                                                     | List – Buildings Designed by H. C. Hibbs, n.d.                                                                          |
|             | Folder 9                                                                                                                     | Brochure, Article, c. 1940's                                                                                            |
|             | Folder 10                                                                                                                    | Bragg Dorm, Fondren Hall – Building Committee, Contracts, n.d.                                                          |
|             | Folder 11                                                                                                                    | Article, May 1952                                                                                                       |
|             | Folder 12                                                                                                                    | Correspondence re: Finish Hardware, 1967                                                                                |
| Photographs | Box 4, Photos 1-8                                                                                                            | Construction (quarry), 1925                                                                                             |
|             | Photos 9-12                                                                                                                  | Construction—Fondren and Bragg                                                                                          |
|             | Photos 13-34                                                                                                                 | Exterior                                                                                                                |
|             | Photos 35-49                                                                                                                 | Interior                                                                                                                |
|             | Box 5, Photos 50-56                                                                                                          | Exterior, c. 1949-1950's                                                                                                |
|             | Photo 57                                                                                                                     | Construction, c. 1950's                                                                                                 |
|             | Photos 58-64                                                                                                                 | Exterior                                                                                                                |
|             | Photo 65                                                                                                                     | Fondren Hall Recreation Room—Interior                                                                                   |
|             | Photos 66-72                                                                                                                 | Construction, c. 1927                                                                                                   |
|             | Photos 73-79                                                                                                                 | Exterior, c. 1927-28                                                                                                    |
|             | Photo 80                                                                                                                     | Fondren Hall—Exterior                                                                                                   |
|             | Photo 81                                                                                                                     | Cadwaller Men's Residence Hall—Exterior, c. 1962                                                                        |
|             | Photo 82                                                                                                                     | Married Student Apartments, Cuninggim Memorial—Exterior, c. 1960                                                        |
| Negatives   | Box 1, Negatives 1-9                                                                                                         | Five match photos, four do not.                                                                                         |
| Oversize    | Box 1, Folder 7                                                                                                              |                                                                                                                         |
|             | 5 items—                                                                                                                     |                                                                                                                         |
|             | 1. Gravure Sunday Section, "First Scarritt College Buildings Completed," <u>Nashville Banner</u> , July 3, 1927              |                                                                                                                         |
|             | 2. Rotogravure Section, "Scarritt Buildings to be Dedicated at Golden Jubilee," <u>Nashville Tennessean</u> , March 11, 1928 |                                                                                                                         |

3. Sunday Magazine, Feature on Wightman Chapel as Favorite Wedding Site, Nashville Tennessean, August 8, 1937
4. Promotional brochure with campus map, c. 1943
5. Special Reprint, "Scarritt to Get Extension Funds," Nashville Banner, May 3, 1952

|                                                        |                               |                                                                                                                                             |
|--------------------------------------------------------|-------------------------------|---------------------------------------------------------------------------------------------------------------------------------------------|
|                                                        | Box 2, Photo 4                | View of Scarritt Administration Building and Tower (similar to Photos 25, 26, 61)                                                           |
|                                                        | Photo 8                       | View of Scarritt Tower with trees and corner of Wightman Chapel in foreground (incorrectly labeled on back as "Chapel of Scarritt College") |
| Lantern Slides                                         | Box 6, Slide 27               | Scarritt College—Tower—negative image                                                                                                       |
|                                                        | Box 7, Slide 45               | Scarritt College—Tower                                                                                                                      |
| Plans                                                  | Box 1, Folders 16-19          | Bragg Dormitory (c. 1951?), Fondren Hall (c. 1949), Married Student Apartment Building (c. 1960), Men's Dormitory (c. 1962)                 |
|                                                        | Drawers 11-15                 | See Appendix B (est. 300+ plans, drawings and sketches)                                                                                     |
| <b>Selvidge, Dr. R. W., House for</b>                  |                               |                                                                                                                                             |
| Plans                                                  | Drawer 17, Folder 1 (2 items) | N.d, likely c. 1919 – shows features such as sleeping porch & maid's room in basement – also shows Hibbs' office location as Peabody Campus |
| <b>Sevier Park Community Center</b>                    |                               |                                                                                                                                             |
| Negatives                                              | Box 1 Negative 1              | Rendering, n.d.                                                                                                                             |
| <b>Sharp, Mr. &amp; Mrs. Alfred, Residence</b>         |                               |                                                                                                                                             |
| Plans (unprocessed)                                    | Box 4, Folder 1               | c. 1936                                                                                                                                     |
| <b>Shelton, H. T., Residence, Columbia, TN</b>         |                               |                                                                                                                                             |
| Documents                                              | Box 2, Folder 1               | Job Notes, n.d.                                                                                                                             |
| Plans (unprocessed)                                    | Box 4, Folder 1               | n.d.                                                                                                                                        |
| <b>Sinclair, Miss Francis, Residence</b>               |                               |                                                                                                                                             |
| Plans (unprocessed)                                    | Box 4, Folder 1               | West Ashwood Avenue, c. 1928                                                                                                                |
| <b>Smith, Mr. &amp; Mrs. Daugh W. Smith, Residence</b> |                               |                                                                                                                                             |
| Plans (unprocessed)                                    | Box 4, Folder 1               | Hillsboro Road, c. 1941                                                                                                                     |

**Smyrna School / Smyrna, Tennessee, A School Building for**

|             |                     |                        |
|-------------|---------------------|------------------------|
| Photographs | Box 6, Photos 1-7   | Exterior, c. 1919-1920 |
| Plans       | Drawer 17, Folder 1 | c. 1919                |

**Souby, Mr. A. M., Residence**

|                     |                 |         |
|---------------------|-----------------|---------|
| Plans (unprocessed) | Box 4, Folder 1 | c. 1922 |
|---------------------|-----------------|---------|

**Southern College of Y.M.C.A. (a.k.a. Y.M.C.A. Graduate School, later Wesley Hall)**

|             |                     |                                                                                                                                            |
|-------------|---------------------|--------------------------------------------------------------------------------------------------------------------------------------------|
| Photographs | Box 6, Photo 1      | Newsclip, n.d.                                                                                                                             |
| Plans       | Drawer 18, Folder 1 | Various window, wood, door details, c. 1926-1927                                                                                           |
|             | Folder 2            | Various window, door details (shower room swimming pool, keystones, Charles Street entrance), c. 1926-1927                                 |
|             | Folder 3            | Various details (elevation of Charles Street entrance, men's shower room, hand ball court), c. 1927                                        |
|             | Folder 4            | Misc. details (auditorium stage, skylights, doors, shows street boundaries as Peabody campus, Charles Street, and Hillsboro Road), c. 1927 |

**Southwestern**

|             |                   |                                                                                                                             |
|-------------|-------------------|-----------------------------------------------------------------------------------------------------------------------------|
| Documents   | Box 2, Folder 1   | Brochures, Articles, 1923-early 1960's                                                                                      |
|             | Folder 2          | Advertisement, late 20 <sup>th</sup> century                                                                                |
| Photographs | Box 6, Photos 1-8 | Construction, c. 1925                                                                                                       |
|             | Photos 9-33       | Exterior                                                                                                                    |
|             | Photos 34-40      | Interior                                                                                                                    |
|             | Photos 41-44      | Construction, c. 1925                                                                                                       |
|             | Photos 45-47      | Exterior                                                                                                                    |
| Oversize    | Box 2, Photo 1    | Angled view of front entrance of Palmer Administration Building                                                             |
|             | Photo 5           | View of main entrance and front face of Palmer Administration Building. (similar to Photo 16). Image is cracked / bent.     |
|             | Photo 11          | Angled view of Palmer Administration Building taken from far left hand side. Ivy is growing on building. Trees frame photo. |

|                     |                 |                                                                                                         |
|---------------------|-----------------|---------------------------------------------------------------------------------------------------------|
|                     | Photo 12        | View of courtyard taken from within alcove. Appears to be a section of Neely Dining Hall in background. |
| Plans (unprocessed) | Box 4, Folder 1 | Men's Dorm, c.1923                                                                                      |
|                     | Folder 2        | President's House and High Tower, c. 1923                                                               |
|                     | Folder 3        | Dining Hall and Kitchen, c. 1924                                                                        |
|                     | Folder 4        | Administration Building, c. 1923                                                                        |
|                     | Folder 5        | Science Building, c. 1924                                                                               |
|                     | Folder 6        | Women's Building, c. 1945                                                                               |

Note: For Southwestern Tower, see also Scarritt Tower plans

### **St. John's Methodist Church, Owensboro, KY**

|           |                   |                           |
|-----------|-------------------|---------------------------|
| Negatives | Box 1, Negative 1 | Aerial rendering, c. 1961 |
|-----------|-------------------|---------------------------|

### **St. Mary's Catholic Church**

|             |                |                   |
|-------------|----------------|-------------------|
| Photographs | Box 6, Photo 1 | Snapshot, c. 1961 |
|-------------|----------------|-------------------|

### **Tennessee Central Railroad Terminal Station & Office Building (Proposed) – [ First Ave. and Broad St. ]**

|             |                       |                          |
|-------------|-----------------------|--------------------------|
| Documents   | Box 2, Folder 1       | Job Notes, Article, 1930 |
| Photographs | Box 6, Photos 1-3     | Exterior                 |
| Plans       | Drawer 7, Folders 1-3 | c. 1930                  |

### **Tennessee Vocational School for Delinquent Girls**

|             |                   |                        |
|-------------|-------------------|------------------------|
| Photographs | Box 6, Photos 1-2 | Newsclips re: hospital |
|-------------|-------------------|------------------------|

### **Third Street Methodist Church, Owensboro, KY**

|       |                  |                                                   |
|-------|------------------|---------------------------------------------------|
| Plans | Box 1, Folder 20 | Proposed sanctuary and educational building, n.d. |
|-------|------------------|---------------------------------------------------|

### **Tipton, Mr. & Mrs. Albert, Russellville, KY**

|       |                     |         |
|-------|---------------------|---------|
| Plans | Drawer 10, Folder 1 | c. 1953 |
|-------|---------------------|---------|

### **Tri Delta Sorority House**

|           |                   |                   |
|-----------|-------------------|-------------------|
| Negatives | Box 1, Negative 1 | Rendering c. 1961 |
|-----------|-------------------|-------------------|

### **Una Elementary School**

|           |                    |                                    |
|-----------|--------------------|------------------------------------|
| Documents | Box 2, Folder 1    | Specifications for Addition, 1951  |
| Plans     | Drawer 7, Folder 1 | Preliminary drawings, c. 1951-1952 |

### **Unidentified Church in North Carolina**

|           |                      |                                          |
|-----------|----------------------|------------------------------------------|
| Negatives | Box 1, Negatives 1-3 | Views of church steeple thru trees, n.d. |
|-----------|----------------------|------------------------------------------|

### **University of South Carolina, Columbia, S.C.**

|                                                                              |                    |                                                                                                                         |
|------------------------------------------------------------------------------|--------------------|-------------------------------------------------------------------------------------------------------------------------|
| Documents                                                                    | Box 2, Folder 1    | Library Building—Brochure, Articles, Correspondence re: Dedication, 1941, 1945                                          |
| Photographs                                                                  | Box 6, Photos 1-14 | Construction, c. 1940                                                                                                   |
| Oversize                                                                     | Box 1, Folder 4    | News article, front page, "Carolina Library Dedicated Today," <u>The State</u> (South Carolina newspaper), June 2, 1941 |
| Plans (unprocessed - Closed Stacks Workroom, Range 4, Section 1 – top shelf) | Box 5, Folder 1-2  | Library, Details, c. 1939-1941                                                                                          |
| Plans (unprocessed - rolled - Map Room, Shelf 14)                            | Box 1              | Library, Details, c. 1938-1940                                                                                          |

### **University of Tulsa, OK**

|                     |                     |                                                                                      |
|---------------------|---------------------|--------------------------------------------------------------------------------------|
| Documents           | Box 2, Folder 1     | Bulletin, Article, Program re; Buildings, 1930-1934                                  |
|                     | Folder 2            | Bulletin, School of Fine Arts, 1930-1931                                             |
| Photographs         | Box 6, Photos 1-7   | Exterior, c. 1930-1931                                                               |
| Negatives           | Box 1, Negative 1   | No photo. View of architectural plan for library building's west elevation, c. 1929. |
| Plans               | Drawer 10, Folder 1 | Library, c. 1929                                                                     |
| Plans (unprocessed) | Box 5, Folder 1     | Fine Arts building, c. 1929                                                          |
|                     | Folder 2            | Petroleum Engineering building, c. 1929                                              |

### **Vanderbilt University**

|             |                 |                                                                   |
|-------------|-----------------|-------------------------------------------------------------------|
| Documents   | Box 2, Folder 1 | Guide, Map, Articles re: Various Buildings, c. 1925-19??          |
|             | Folder 2        | Alumni Memorial Hall—Articles, c. 1920-1925                       |
|             | Folder 3        | Joint University Library—Program, Articles, 1939-1941             |
|             | Folder 4        | Joint University Library—Furniture Specs & Equipments Lists, 1940 |
|             | Folder 5        | Village at Vanderbilt newsclip, July 13, 1988                     |
| Photographs | Box 7, Photo1   | Alumni Memorial Hall—Exterior, c. 1920-1924                       |
|             | Photos 2-8      | Alumni Memorial Hall—Exterior c. 1925-late 1920's                 |
|             | Photos 9-15     | Alumni Memorial Hall—Interior, c. 1925                            |
|             | Photos 16-18    | Hospital Addition—Exterior, c. 1938                               |
|             | Photo 19        | Buttrick Hall—Exterior c. 1927-28                                 |

|                                                                              |                 |              |                                                                                                                                            |
|------------------------------------------------------------------------------|-----------------|--------------|--------------------------------------------------------------------------------------------------------------------------------------------|
|                                                                              |                 | Photo 20     | Interior (likely Buttrick, Garland or Calhoun Halls), c. 1927-1928                                                                         |
|                                                                              |                 | Photos 21-25 | Joint University Library—Exterior c. 1940-42                                                                                               |
|                                                                              |                 | Photos 26-28 | Joint University Library—Interior c. 1941-42                                                                                               |
|                                                                              |                 | Photos 29-35 | Neely Auditorium—Exterior c. 1925                                                                                                          |
|                                                                              |                 | Photo 36     | Neely Auditorium—Interior c. 1925                                                                                                          |
|                                                                              |                 | Photos 37-38 | Wesley Hall—Exterior                                                                                                                       |
|                                                                              |                 | Photos 39-42 | Construction (likely for Alumni Hall or Neely Auditorium)                                                                                  |
|                                                                              |                 | Photos 43-44 | Neely Auditorium—Exterior                                                                                                                  |
|                                                                              |                 | Photo 45     | Alumni Memorial Hall—Exterior                                                                                                              |
|                                                                              |                 | Photos 46-47 | Joint University Library—Interior                                                                                                          |
|                                                                              |                 | Photo 48     | Joint University Library—Exterior                                                                                                          |
|                                                                              |                 | Photo 49     | Neely Auditorium—Exterior                                                                                                                  |
|                                                                              |                 | Photo 50     | Neely Auditorium—Interior                                                                                                                  |
|                                                                              |                 | Photos 51-52 | Hospital Addition—Exterior, c. 1938                                                                                                        |
|                                                                              |                 | Photos 53-55 | Alumni Memorial Hall—Exterior                                                                                                              |
| Oversize                                                                     | Box 1, Folder 6 |              | News article, front page, “Nashville’s New Joint University Library Now in Operation,” <u>Nashville Tennessean</u> , Sept. 28, 1941        |
|                                                                              | Folder 6        |              | News article, feature, “Three New Buildings in Use at Vanderbilt,” [Garland, Buttrick, Calhoun] <u>Nashville Tennessean</u> , Oct. 7, 1928 |
|                                                                              | Box 2, Photo 9  |              | Buttrick Hall—angled view of biology building. Duplicate of Vanderbilt University Photo 19, printed in matte format.                       |
|                                                                              |                 | Photo 10     | Alumni Memorial Hall—Interior—View of Memorial Fireplace, similar to Vanderbilt University Photo 11                                        |
| Plans (unprocessed - Closed Stacks Workroom, Range 4, Section 1 – top shelf) |                 |              |                                                                                                                                            |
|                                                                              | Box 5, Folder 1 |              | Neely Auditorium—stage alterations, c. 1937                                                                                                |
|                                                                              | Folder 2        |              | Sketches on court of record [Frederick W. Vanderbilt Court behind Joint University Library] , c. 1940                                      |
|                                                                              | Folder 3-4      |              | Joint University Library, Furniture for, c. 1940                                                                                           |
| Plans (unprocessed - rolled - Map Room, Shelf 14)                            |                 |              |                                                                                                                                            |

|                                                                |                                         |                                                                                                                                                     |
|----------------------------------------------------------------|-----------------------------------------|-----------------------------------------------------------------------------------------------------------------------------------------------------|
|                                                                | Box 1                                   | Neely Auditorium—Details, c. 1924, 1939                                                                                                             |
| <b>Villa Place, A House to be Built on</b>                     |                                         |                                                                                                                                                     |
| Plans                                                          | Drawer 17, Folder 1                     | c. April 1919                                                                                                                                       |
| <b>Wagner, R. L., Residence</b>                                |                                         |                                                                                                                                                     |
| Plans                                                          | Box 1, Folder 21                        | n.d.                                                                                                                                                |
| <b>Ward-Belmont College</b>                                    |                                         |                                                                                                                                                     |
| Photographs                                                    | Box 7, Photo 1                          | Senior Hall—News article                                                                                                                            |
| <b>Waverly Place Methodist Church</b>                          |                                         |                                                                                                                                                     |
| Negatives                                                      | Box 1, Negative 1                       | Close up of front face of building, c. 1955                                                                                                         |
| Plans                                                          | Box 1, Folder 22                        | Educational building, n.d.                                                                                                                          |
| <b>Webb, Dwight T., Esq., Residence</b>                        |                                         |                                                                                                                                                     |
| Plans (unprocessed)                                            | Box 5, Folder 1                         | c. 1917                                                                                                                                             |
| <b>Wellesley College, Liberal Arts Building, Wellesley, MA</b> |                                         |                                                                                                                                                     |
| Plans                                                          | Drawer 16<br>(3 items)                  | Day & Klauder Architects, c. 1917-1918                                                                                                              |
| <b>Wesley Foundation</b>                                       |                                         |                                                                                                                                                     |
| Photographs                                                    | Box 7, Photo 1                          | Exterior, c. 1952                                                                                                                                   |
| <b>Wesleyan Heights Methodist Church</b>                       |                                         |                                                                                                                                                     |
| Photographs                                                    | Box 7, Photos 1-2                       | Exterior, 1965                                                                                                                                      |
| Negatives                                                      | Box 1, Negative 1                       | No photo. Aerial rendering, c. 1956                                                                                                                 |
| <b>West Nashville Methodist Church</b>                         |                                         |                                                                                                                                                     |
| Negatives                                                      | Box 1, Negative 1                       | Rendering of church front, c. 1957                                                                                                                  |
| <b>Western State Hospital, Bolivar, TN</b>                     |                                         |                                                                                                                                                     |
| Photographs                                                    | Box 7, Photo 1                          | Exterior, 1932                                                                                                                                      |
| <b>Westfield, New Jersey, Post Office</b>                      |                                         |                                                                                                                                                     |
| Oversize                                                       | Box 1, Folder 5                         | News article, “Westfield’s New Post Office Building,” <u>Union County Standard</u> , Westfield, N. J., Sept. 8, 1911                                |
| Plans                                                          | Drawer 16<br>Folder 1 of 1<br>(4 items) | Front & rear elevations, 1 <sup>st</sup> & 2 <sup>nd</sup> story plans, cellar & 3 <sup>rd</sup> story plans, main entrance details – shared a wall |

w/ a neighboring store – offices 2<sup>nd</sup>  
level, apartments 3<sup>rd</sup> level

**Westfield, New Jersey, Residence**

|             |                |                |
|-------------|----------------|----------------|
| Photographs | Box 7, Photo 1 | Exterior, 1911 |
|-------------|----------------|----------------|

**Westfield, New Jersey, Theatre Building for Mr. Walter W. Mooney**

|       |                            |                                                                                                                                                                                                  |
|-------|----------------------------|--------------------------------------------------------------------------------------------------------------------------------------------------------------------------------------------------|
| Plans | Drawer 16                  |                                                                                                                                                                                                  |
|       | Folder 1 of 1<br>(8 items) | Basement (with bowling alleys), 1 <sup>st</sup><br>story, longitudinal section, street &<br>stage elevations – c. 1911 – undated<br>but were grouped with the Westfield,<br>NJ Post Office plans |

**White, D. W., Residence**

|                     |                      |                                                                                                |
|---------------------|----------------------|------------------------------------------------------------------------------------------------|
| Documents           | Box 2, Folder 1      | Job Notes                                                                                      |
| Photographs         | Box 7, Photo 1       | Exterior                                                                                       |
| Negatives           | Box 1, Negatives 1-2 | Match to photo 1. Neg. 2 no photo.                                                             |
| Plans (unprocessed) | Box 5, Folder 1      | Matted rendering with watercolor,<br>c. 1920-1921                                              |
|                     | Folder 2             | Remaining plans, labelled - On<br>Franklin Road Four Miles from<br>Custom House, c. 1920-19212 |

**White, George, Residence**

|                     |                 |                       |
|---------------------|-----------------|-----------------------|
| Plans (unprocessed) | Box 5, Folder 1 | Franklin Road, c.1920 |
|---------------------|-----------------|-----------------------|

**Whitfield, J. G., Residence**

|       |                     |                                                                                        |
|-------|---------------------|----------------------------------------------------------------------------------------|
| Plans | Drawer 18, Folder 1 | Spring Hill, TN – Alterations and<br>additions to the country residence of,<br>c. 1920 |
|-------|---------------------|----------------------------------------------------------------------------------------|

**Wilson, Mrs. Jonathan A., Residence**

|       |                     |                                                    |
|-------|---------------------|----------------------------------------------------|
| Plans | Drawer 18, Folder 1 | Westmoreland Place, Nashville, TN,<br>c. June 1921 |
|-------|---------------------|----------------------------------------------------|

**Woodbine Methodist Church**

|             |                   |                                 |
|-------------|-------------------|---------------------------------|
| Photographs | Box 7, Photos 1-4 | Exterior, c. 1961-1962          |
| Plans       | Box 1, Folder 23  | New education building, c. 1960 |

**Woodland Street Presbyterian Church**

|             |                    |                                                     |
|-------------|--------------------|-----------------------------------------------------|
| Documents   | Box 2, Folder 1    | Addition—Job Notes,<br>Articles, Program, 1957-1959 |
| Photographs | Box 7, Photos 1-10 | Exterior, c. 1957-1959                              |

|           |                       |                                                                             |
|-----------|-----------------------|-----------------------------------------------------------------------------|
| Negatives | Box 1, Negative 1     | No photo. Rendering of original sanctuary with building additions, c. 1957. |
| Plans     | Drawer 6, Folders 1-2 | Alteration / Addition, c. 1946                                              |

**Yale University, Peabody Museum of Natural History, New Haven, CT**

|       |                                  |                                   |
|-------|----------------------------------|-----------------------------------|
| Plans | Drawer 16, Folder 1<br>(2 items) | Architects Day & Klauder, c. 1923 |
|-------|----------------------------------|-----------------------------------|

**SERIES II. – PROFESSIONAL, 1896-1975, DOCUMENTS BOXES 1-3, OVERSIZE BOXES 1-2**

**Series Abstract/Description:** Series II contains the professional papers of Henry C. Hibbs and includes information about his education, his early career and influences, and his professional achievements and activities in Nashville and the south.

**Arrangement:** Series II contains mostly documents, housed either in legal or oversize boxes. The primary exception is Hibbs' portfolio of photographs representing his exhibit for the 1929 architectural exposition in Memphis. This photographic portfolio is housed in Oversize Box 2.

---

**Container List—Series II:**

| <b>Box</b> | <b>Folder</b> | <b><i>Professional – Documents</i></b>                                                                                                                                                                                                                                          |
|------------|---------------|---------------------------------------------------------------------------------------------------------------------------------------------------------------------------------------------------------------------------------------------------------------------------------|
|            |               | Education                                                                                                                                                                                                                                                                       |
| 1          | 1             | Early to College – Certificates, Diploma, Programs, Newsclip, 1896-1904                                                                                                                                                                                                         |
|            |               | Professional Activities                                                                                                                                                                                                                                                         |
| 1          | 2             | Letter from Frank Miles Day and Brother; A. I. A. membership; Newsclips re: public talks, Hibbs features, article penned by Hibbs, 1905-c.1928                                                                                                                                  |
| 1          | 3             | Issue of <i>The Architectural Review</i> , featuring the work of Day & Klauder architects, May 1921.                                                                                                                                                                            |
| 1          | 4             | Issue of <i>Southern Architect and Building News</i> featuring "The Collegiate Architecture of Henry C. Hibbs", September 1928.                                                                                                                                                 |
| 1          | 5             | <i>Official Catalog, Southern Architectural and Industrial Arts Exposition, Under Auspices [of the] Southern Chapters A. I. A., November 9-16, 1929. Municipal Auditorium, Memphis, Tennessee, from the Press of The Southern Architect and Building News, Atlanta, Georgia</i> |
| 1          | 6             | Issue of <i>Southern Architect and Building News, December 1929</i> , devoted to the "south's first architectural and industrial arts exposition," featuring work by Henry C. Hibbs, pages 43 – 48.                                                                             |

|   |    |                                                                                                                                                                                |
|---|----|--------------------------------------------------------------------------------------------------------------------------------------------------------------------------------|
| 1 | 7  | Letters of recommendation and correspondence re: contracts and bids, c. 1920's.                                                                                                |
|   |    | Professional Activities –                                                                                                                                                      |
| 1 | 8  | Articles authored by Hibbs, documents re: fellowship and honorary degrees, certifications for practicing in North and South Carolina, 1930's                                   |
| 1 | 9  | Miscellaneous undated newsclips re: Hibbs' activities and talks, business cards and stationary                                                                                 |
| 1 | 10 | Letters of recommendation and correspondence re: contracts and bids, 1930's                                                                                                    |
| 1 | 11 | Letters of recommendation and correspondence re: contracts and bids, 1940's                                                                                                    |
| 2 | 1  | Letters of recommendation and correspondence re: contracts and bids, undated                                                                                                   |
| 2 | 2  | Professional Activities – Hibbs, Howe & Reese – partners in building the Memphis General Hospital for the U.S. War Department – contracts, correspondence, receipts, 1942-1943 |
| 2 | 3  | Income tax papers – Business, 1948                                                                                                                                             |
| 2 | 4  | Professional Activities – Certificates, licensee cards to practice in states other than Tennessee, 1929-1931                                                                   |
| 2 | 5  | Professional Activities – Agreement at death of Henry Hibbs between partner H. C. Parrent, Jr. and Mrs. Agnes R. Hibbs, 1949                                                   |
| 2 | 6  | Professional Activities – Thesis by Joseph L. Herndon, <i>Architects in Tennessee until 1930, A Dictionary</i> , 1975                                                          |
| 2 | 7  | Office Statements, Lease for Office at American Trust Building – 1920-1935                                                                                                     |
| 2 | 8  | Forms – Various                                                                                                                                                                |
| 2 | 9  | Plans – Drawings of signage for Hibbs' office. Items removed to unprocessed plans.                                                                                             |
| 2 | 10 | Professional – Jacobean oak furniture – correspondence, brochure re: furniture for building interiors, c. 1925-1926                                                            |
| 2 | 11 | Professional – Pocket reference guide #1 – likely used by Mr. Hibbs, c. 1910-1949 (prim. info. 19-teens to 1920's)                                                             |
| 2 | 12 | Professional – Pocket reference guide #2 – likely used by Mr. Hibbs or also possibly W. Terrill Hall, c. 1920-1950.                                                            |
| 2 | 13 | Professional – Pocket reference guide #2 – cover minus contents – includes Hibbs' personal label on inside front cover.                                                        |
| 2 | 14 | Professional – Pocket reference guide #3 – used by W. Terrill Hall (per donor, Harriet Hall Cates), c. 1916 – (at least) 1947                                                  |
| 3 | 1  | Professional – Influences – Princeton University Photogravures album, c. 1919?                                                                                                 |

|            |               |                                                                                                                                                                                                                                                                |
|------------|---------------|----------------------------------------------------------------------------------------------------------------------------------------------------------------------------------------------------------------------------------------------------------------|
| 3          | 2             | Professional – Influences – Yale University – Memorial Quadrangle & Harkness Tower – postcards (9), aerial view drawing, n.d.                                                                                                                                  |
| 3          | 3             | Professional – Influences – Yale University – Memorial Quadrangle & Harkness Tower – <i>Alumni Weekly</i> issue, loose pages from <i>Architectural Review</i> , c. 1920-1921.                                                                                  |
| <b>Box</b> | <b>Folder</b> | <b>Oversize</b>                                                                                                                                                                                                                                                |
| 1          | 2             | Certificate of Appointment to Membership of the State of Tennessee Board of Architectural and Engineering Examiners, May 15, 1921                                                                                                                              |
|            |               | Certificate of Registration, State of North Carolina Board of Architectural Examination and Registration, July 28, 1939                                                                                                                                        |
|            | 3             | College / Fraternity Poster, “Oh Sophs” – Class of 1903                                                                                                                                                                                                        |
|            | 5             | News article, full page feature: “Optimism: Fifth of a Series of Nashville Business Men,” <i>Nashville Tennessean</i> , Rotogravure Section, March 20, 1921                                                                                                    |
|            |               | News article, feature: “Some Very Fine Sketches are Being Exhibited in the Display of the Tennessee Chapter, American Institute of Architects, <i>The Commercial Appeal, Memphis</i> , January 20, 1924. Hibbs’ drawings of Peabody and Scarritt are included. |
|            |               | News article, full page feature: “Exhibit of Nashville Architecture Wins Medals,” <i>Nashville Banner</i> , Photogravure, December 1, 1929                                                                                                                     |
| 2          |               | Portfolio of Images for the Southern Architectural and Industrial Arts Exposition, Municipal Auditorium, Memphis, Tennessee, November 9-16, 1929                                                                                                               |

### **SERIES III. – PERSONAL, 1882 – C. 1988, MULTIPLE FORMATS AND BOXES:**

Series III contains materials related to the personal life of Henry C. Hibbs, including photographs taken of Mr. Hibbs throughout his life, correspondence with family, church activities, honorary awards, club membership and participation, and hobbies. It is organized in five subseries: Family/Personal, Miscellaneous Correspondence, Coffee House Club Papers, Death of Henry C. Hibbs, and W. Terrill Hall.

The Family/Personal subseries includes correspondence with his parents, his daughter Harriett, and with mourners over the death of his grandchild in February 1949. It also includes items relating to his membership in various clubs and lodges, as well as the positions he served in as a member of the First Presbyterian Church (Fifth and Church) congregation.

The Miscellaneous Correspondence subseries spans from 1918 to 1949 and includes mostly non-professional correspondence such as: a copy of contractual document related to a farm Hibbs owned in Dickson County (1918); a character reading (1922); automobile, life insurance, and income tax documents; mileage rationing and other wartime-related documents (1940's); favorite poems; and a variety of correspondence with personal and business associates over the years. Professional-related correspondence includes recommendation letters by others for Hibbs as he sought governmental contracts during World War II.

The Coffee House Club Papers subseries includes Hibbs' monograph "Frozen Music", an essay examining the parallels between music and architecture which he presented at club meetings, and the corresponding lantern slides used for the presentation. This series also contains other papers authored by Hibbs and his club members, as well as many unidentified lantern slides that were likely used during similar talks.

The Death of Henry C. Hibbs subseries contains correspondence about and reactions to the news of Hibbs' unexpected death on March 3, 1949.

The W. Terrill Hall subseries contains a biographical essay he authored about Hibbs' life and career, along with other research Hall gathered about Mr. Hibbs' works and career.

**Arrangement:** Series III containers are grouped by format (documents, photos, oversize and lantern slides). Within each format, they are arranged by subseries and/or topic, and then in loose chronological order within each subseries.

---

#### Container List

| <i>Box</i> | <i>Folder</i> | <i>Personal – Documents</i>                                                                                             |
|------------|---------------|-------------------------------------------------------------------------------------------------------------------------|
|            |               | Family / Personal –                                                                                                     |
| 1          | 1             | Correspondence from Father (2 letters), May-June 1896                                                                   |
| 1          | 2             | Childhood, Creative Works, n.d.                                                                                         |
| 1          | 3             | Correspondence (postcards), one from daughter Elizabeth, 1922, 1925.                                                    |
| 1          | 4             | Correspondence with mother, Mrs. J. K. Hibbs, re: accomplishments and noteworthy recommendation letters, March 19, 1931 |
| 1          | 5             | Correspondence to daughter Harriett, n. d.                                                                              |
| 1          | 6             | Correspondence received re: death of grandchild, Feb. 22, 1949.                                                         |
| 1          | 7             | Church Activities – First Presbyterian Church, 5 <sup>th</sup> and Church Streets, 1916- c. 1945                        |
| 1          | 8             | Civic Activities – Grand Jury, Arbitration Association, 1940, 1944                                                      |
| 1          | 9             | Memberships & Clubs – Coffee House Clubs, Masons, 1917-1949                                                             |

[ See Oversize Box 1, Folder 3 – Masonic Lodge,  
32 Degree certificate, May 24, 1917 ]

#### Miscellaneous Correspondence

|   |    |                          |
|---|----|--------------------------|
| 1 | 10 | 1918-1949                |
| 1 | 11 | 1927-1940                |
| 1 | 12 | c. World War II – 1940's |
| 1 | 13 | 1942-1945 (primarily)    |
| 1 | 14 | 1946                     |
| 1 | 15 | 1947                     |
| 1 | 16 | 1947 (cont'd)            |
| 1 | 17 | 1948                     |

|   |   |                                                   |
|---|---|---------------------------------------------------|
| 2 | 1 | Income Tax Papers – Business and Personal, 1940's |
|---|---|---------------------------------------------------|

#### Coffee House Club Papers

|   |    |                                                                                                                                                                     |
|---|----|---------------------------------------------------------------------------------------------------------------------------------------------------------------------|
| 2 | 2  | Essay / monograph "Frozen Music" by Henry C. Hibbs –<br>Drafts, Correspondence & Notes, c. 1947                                                                     |
| 2 | 3  | Cont'd – Essay / monograph "Frozen Music", c. 1947                                                                                                                  |
| 2 | 4  | Architecture and Music, "Visual Melodies", Paper Prepared<br>by Henry C. Hibbs and Delivered at Meeting of<br>CHC Nashville, n.d.                                   |
| 2 | 5  | "Brunswick Stew" by Henry C. Hibbs, October 17, 1946                                                                                                                |
| 2 | 6  | Vol. I – Untitled Paper – Author possibly Hibbs – Topic is<br>"Sex Sterilization of Mental Defectives", n.d.                                                        |
| 2 | 7  | Vol. I, cont'd – "Air Conditioning" – Author possibly<br>Hibbs, December 10, 1937                                                                                   |
| 2 | 8  | Vol. I, cont'd – Various papers presented at CHC meetings,<br>includes miscellaneous correspondence related to<br>papers, c. 1930's                                 |
| 2 | 9  | Vol. I, cont'd – "The City of Washington", author likely<br>Hibbs, 1931                                                                                             |
| 2 | 10 | Vol. I, cont'd – "The City of Washington", supplemental<br>materials, 1931<br>[ See Oversize Box 1, Folder 3 – Overview map of<br>The Mall, Washington, D.C., n.d.] |
| 2 | 11 | Vol. I, cont'd – supplemental materials re: Mayan ruins,<br>n.d.                                                                                                    |
| 2 | 12 | Vol. II, numerous papers and notes, likely various authors –<br>1925, 1946                                                                                          |

#### Coffee House Club, cont'd

|   |   |                                                                         |
|---|---|-------------------------------------------------------------------------|
| 3 | 1 | Vol. II, Numerous Papers, Notes and Supporting Materials,<br>1948(?)    |
| 3 | 2 | Membership Rosters, Meeting Schedules, and<br>Correspondence, 1945-1949 |

|   |    |                                                                                                                                |
|---|----|--------------------------------------------------------------------------------------------------------------------------------|
| 3 | 3  | "Immortalizing Call", a Paper by Alec B. Stevenson, Jan. 20, 1949                                                              |
| 3 | 4  | Hobbies – Fishing, Other, c. 1947 [ See Oversize Box 1, Folder 3 – Dale Hollow Lake fishing map ]                              |
|   |    | Death of Henry C. Hibbs                                                                                                        |
| 3 | 5  | Newsclips re: Death of HCH and Granddaughter, February-March 1949                                                              |
| 3 | 6  | Information re: Cause of Death, Funeral Service, Poems Given to Mrs. Hibbs, 1949                                               |
| 3 | 7  | Correspondence, Reactions to His Passing, March-October 1949                                                                   |
| 3 | 8  | Correspondence by W. T. Hall, H. C. Parrent re: Death of HCH; Information re: estate, Other, March 1949                        |
| 3 | 9  | Correspondence re: Firm, Estate, 1949                                                                                          |
| 3 | 10 | Note (author unknown) and newsclip re: Nacome Recreation Center dedicated in memory of HCH, June 1950                          |
| 3 | 11 | Eulogy for Mrs. Agnes Bryan Hibbs, Apr. 22, 1970                                                                               |
|   |    | W. Terrill Hall                                                                                                                |
| 3 | 12 | Paper entitled, "Henry C. Hibbs, F.A.I.A. – Nashville Architect and Architecture," by W. Terrill Hall, A.I.A., April 11, 1983. |
| 3 | 13 | Biographical and Research Information re: HCH, c. 1928-1988                                                                    |
| 3 | 14 | Letters of Disposition of Hibbs' Records and Drawings, 1975                                                                    |
| 3 | 15 | Building Lists, Drawing Lists, and Research Information re: HCH, 1962, 1983                                                    |
| 3 | 16 | Brochures, Articles re: Architectural Profession, Middle Tennessee A. I. A. activities, c. 1958-1962                           |

| <b>Box</b> | <b>Folder</b> | <b>Personal – Photographs</b>                                                                                       |
|------------|---------------|---------------------------------------------------------------------------------------------------------------------|
| 1          | 1             | Personal – Henry Closson Hibbs, 1882                                                                                |
| 1          | 2             | Personal – Henry C. Hibbs, toddler                                                                                  |
| 1          | 3             | Personal – Young professional – studio head shot                                                                    |
| 1          | 4             | Memberships & Clubs – Old Oak Club Members, 1932 [See: Oversize Box 1, Folder 1]                                    |
| 1          | 5             | Church / Civic Activities – Boy Scout Banquet at First Presbyterian Church (Downtown), c. 19-teens or early 1920's. |
| 1          | 6             | Family – Henry C. and Agnes Robertson Hibbs, c. 1930's                                                              |
| 1          | 7             | Family – Mr. Hibbs at Christmas at 1804 18 <sup>th</sup> Avenue South, c. 1940's                                    |

|   |          |                                                                                                                                                                                                                               |
|---|----------|-------------------------------------------------------------------------------------------------------------------------------------------------------------------------------------------------------------------------------|
| 1 | 8        | Family – Mr. Hibbs sitting outside, reading, smoking a pipe, c. 1940's.                                                                                                                                                       |
| 1 | 9        | Awards – Group photo including Mr. Hibbs and Southwestern President, Charles Diehl. Hibbs was awarded (honorary) Master of Fine Arts degree at Southwestern at the fifty-seventh annual commencement exercises, June 5, 1932. |
| 1 | 10A, 10B | Personal – Late career – studio 8 x 10 portrait of Mr. Hibbs                                                                                                                                                                  |
| 1 | 11-35    | Fishing – Trips to Florida and Gulf of Mexico. W. Terrill Hall included in some photos, c. 1940's. [ Some negatives available. ]                                                                                              |
| 1 | 36-37    | Miscellaneous Correspondence, 1947 – Image of altar and crucifix. See copy of enclosed correspondence.                                                                                                                        |
| 1 | 38       | Miscellaneous Correspondence, 1947 – Image of residential fireplace and mantel at Davidson College, North Carolina. See copy of enclosed correspondence.                                                                      |
| 1 | 1-22     | Furniture – Jacobean Oak Furniture, c. 1925-1926. (Loosely stored in file folder)                                                                                                                                             |

***Box Folder Personal – Lantern Slides***

All lantern slides are unidentified unless otherwise noted. Grouping is based on original order and original boxing at time of donation and processing.

**LS Box 1: Slides 1-11**  
#1-11 – “Frozen Music” slides

**LS Box 2: Slides 1-12**  
#9 – Davidson College, Chambers Building – rendering  
#10, 12 – Parthenon (Athens or Nashville?)

**LS Box 3: Slides 13-23**  
#15 – Davidson College, Chambers Building

**LS Box 4: Slides 1-12**

**LS Box 5: Slides 13-24**

**LS Box 6: Slides 25-36**  
#27 – Scarritt College, Tower – negative image

**LS Box 7: Slides 37-48**  
#45 – Scarritt College, Tower

**LS Box 8: Slides 49-56**  
#56 – Davidson College, Chambers Building – negative image

***Box Folder Unidentified Photographs***

There are a number (30 or so) of unidentified photographs, the bulk of which date from W. Terrill Hall's years of practice. There is a small number of photographs that appear to date from the 1920's or 1930's of houses designed by Hibbs and one formal studio head shot of an unidentified gentleman.



**Henry C. Hibbs Papers, 1882 – c. 1988**  
**Appendix A**  
**Fisk University – Plans**

| <b>BUILDING</b> | <b>DRAWER</b> | <b>FOLDER</b> | <b>ITEM LEVEL DESCRIPTION</b><br>Note: Library Building is the primary structure in this group                                                                               | <b>ITEM COUNT<br/>PER FOLDER</b> | <b>PLAN #</b> |
|-----------------|---------------|---------------|------------------------------------------------------------------------------------------------------------------------------------------------------------------------------|----------------------------------|---------------|
| Library         | 2             | 1 of 15       | 1 <sup>st</sup> and 2 <sup>nd</sup> story plans;<br>2 <sup>nd</sup> story mezzanine                                                                                          | 4                                | 1             |
|                 |               |               | 3 <sup>rd</sup> thru 9 <sup>th</sup> story plans;<br>Tower plan                                                                                                              |                                  | 2             |
|                 |               |               | East, North elevations                                                                                                                                                       |                                  | 3             |
|                 |               |               | Longitudinal section AA;<br>West elevation                                                                                                                                   |                                  | 4             |
|                 |               | 2 of 15       | Browsing room – elevation east & west walls;<br>Lobbies – 1 <sup>st</sup> and 2 <sup>nd</sup> story;<br>Reading rooms – elevation;<br>Main entrance – section of center line | 3                                | 5             |
|                 |               |               | Main entrance – details;<br>Top of tower – details                                                                                                                           |                                  | 6             |
|                 |               |               | Entrances 112, 124, 136 – half elevation                                                                                                                                     |                                  | 7             |
|                 |               | 3 of 15       | Column schedule;<br>Typical footings;<br>Joint reinforcing                                                                                                                   | 6                                | 8             |
|                 |               |               | Framing – 1 <sup>st</sup> and 2 <sup>nd</sup> floor                                                                                                                          |                                  | 9             |
|                 |               |               | Framing – 3 <sup>rd</sup> and 4 <sup>th</sup> floor                                                                                                                          |                                  | 10            |
|                 |               |               | Framing – Tower                                                                                                                                                              |                                  | 11            |
|                 |               |               | Stairs;<br>Elevator shafts;<br>Chute                                                                                                                                         |                                  | 12            |
|                 |               |               | Revisions to be used w/ sheets 5 & 12                                                                                                                                        |                                  | 12A           |
|                 |               | 4 of 15       | Heating plans                                                                                                                                                                | 6                                | 13            |
|                 |               |               | Plumbing plan                                                                                                                                                                |                                  | [14?]         |
|                 |               |               | Plumbing plan                                                                                                                                                                |                                  | 14A           |
|                 |               |               | 1 <sup>st</sup> and 2 <sup>nd</sup> story – clock, buzzer, telephone and<br>teletype outlets – detail                                                                        |                                  | 16            |

| BUILDING | DRAWER | FOLDER  | ITEM LEVEL DESCRIPTION<br>Note: Library Building is the primary structure in this group                         | ITEM COUNT<br>PER FOLDER | PLAN # |
|----------|--------|---------|-----------------------------------------------------------------------------------------------------------------|--------------------------|--------|
|          |        |         | 3 <sup>rd</sup> story and above? - clock, buzzer, telephone and teletype outlets – detail                       |                          | 17     |
|          |        |         | Building tunnel – detail                                                                                        |                          | 18     |
|          |        | 5 of 15 | Reading rooms – bookcases, windows                                                                              | 6                        | 102    |
|          |        |         | Reading rooms – 2 <sup>nd</sup> floor – details                                                                 |                          | 103    |
|          |        |         | Lobby – 2 <sup>nd</sup> story – details                                                                         |                          | 104    |
|          |        |         | Doors – interior, exterior                                                                                      |                          | 105    |
|          |        |         | Terrazo details                                                                                                 |                          | 106    |
|          |        |         | Librarian's office, reading rooms – interior elevations                                                         |                          | 107    |
|          |        | 6 of 15 | 3 <sup>rd</sup> story – lounge – details                                                                        | 6                        | 108    |
|          |        |         | Periodical room – Negro Collection room oppos. Hand sim. – plan                                                 |                          | 109    |
|          |        |         | 2 <sup>nd</sup> story corridor – ceiling plans                                                                  |                          | 110    |
|          |        |         | 1 <sup>st</sup> and 3 <sup>rd</sup> story corridor plan;<br>Typical treatments of picture mould casing at doors |                          | 111    |
|          |        |         | Windows – typical detail                                                                                        |                          | 202    |
|          |        | 7 of 15 | Jamb & Sill sections                                                                                            | 6                        | 203    |
|          |        |         | Windows – head of – interior                                                                                    |                          | 204    |
|          |        |         | Windows – Negro Collection Periodical & Reading Rooms – typical detail                                          |                          | 205    |
|          |        |         | Bays – detail                                                                                                   |                          | 206    |
|          |        |         | Windows – mould over;<br>Boss – elevation of;<br>Bays – soffitt of                                              |                          | 207    |
|          |        |         | Windows – detail                                                                                                |                          | 208    |
|          | 3      | 8 of 15 | Head windows – 801-816 – elevation                                                                              | 6                        | 209    |
|          |        |         | Windows – 901-916 – tracery in – half elevation                                                                 |                          | 210    |
|          |        |         | Head arches 112, 124 136 – section thru;<br>Head door 148;<br>Sill doors 112, 124, 136                          |                          | 211    |
|          |        |         | Cross rib – elevation;<br>Diagonal rib – elevation;                                                             |                          | 212    |

| BUILDING | DRAWER | FOLDER   | ITEM LEVEL DESCRIPTION<br>Note: Library Building is the primary structure in this group | ITEM COUNT<br>PER FOLDER | PLAN #   |
|----------|--------|----------|-----------------------------------------------------------------------------------------|--------------------------|----------|
|          |        |          | Wall rib – elevation;<br>Vault plan                                                     |                          |          |
|          |        |          | Arch – lobby to corridor;<br>1 <sup>st</sup> story lobby – stair out of – elevation     |                          | 213      |
|          |        |          | Vestibules – plans                                                                      |                          | 214      |
|          |        | 9 of 15  | Entrance – buttresses – curved cap                                                      | 6                        | 215      |
|          |        |          | Entrance – buttresses – top joint                                                       |                          | 216      |
|          |        |          | Entrance – buttresses – details                                                         |                          | 218      |
|          |        |          | Door 122 – scale details                                                                |                          | 219      |
|          |        |          | Waterspout – small – details                                                            |                          | 220      |
|          |        |          | Windows – typical detail                                                                |                          | 221      |
|          |        | 10 of 15 | Spiral chute; guards around spiral chute                                                | 3                        | n/a      |
|          |        |          | Doors in front of books shelves – detail – see Dr. White                                |                          | n/a      |
|          |        |          | Clock for Fisk Library                                                                  |                          | n/a      |
|          |        | 11 of 15 | Windows – 301, 337 & 338 – typical detail;<br>Windows – 302, 336 – typical detail       | 4                        | 222, 223 |
|          |        |          | Shields – for entrances 112, 124, 136, 148                                              |                          | 224      |
|          |        |          | Beveled corners in 2 <sup>nd</sup> & 3 <sup>rd</sup> stories – plans                    |                          | 225      |
|          |        | 12 of 15 | Beveled corners in 2 <sup>nd</sup> & 3 <sup>rd</sup> stories – plans                    | 6                        | 226      |
|          |        |          | Shields above windows [ various ] – details                                             |                          | 227      |
|          |        |          | Beveled corners in tower - plans                                                        |                          | 228-230  |
|          |        |          | Pinnacle – lower part; upper part                                                       |                          | 231      |
|          |        | 13 of 15 | Waterspout – large – details                                                            | 6                        | 232      |
|          |        |          | Buttress rib – elevation                                                                |                          | 233      |
|          |        |          | Lettering [for cornerstone?] – university library 1930                                  |                          | 234      |
|          |        |          | Finial over windows – elevation                                                         |                          | 235      |
|          |        |          | Windows – typical detail                                                                |                          | 236      |
|          |        | 14 of 15 | 2 <sup>nd</sup> story lobby – column – scale elevation;<br>Door jamb;<br>Column cap     | 6                        | 237      |

| BUILDING  | DRAWER | FOLDER   | ITEM LEVEL DESCRIPTION<br>Note: Library Building is the primary structure in this group                                                                                                                             | ITEM COUNT<br>PER FOLDER | PLAN #    |
|-----------|--------|----------|---------------------------------------------------------------------------------------------------------------------------------------------------------------------------------------------------------------------|--------------------------|-----------|
|           |        |          | Lounge room – fireplace – details                                                                                                                                                                                   |                          | 238       |
|           |        |          | Center tower – buttress – details                                                                                                                                                                                   |                          | 239       |
|           |        |          | Center tower – buttress – upper part of pinnacle;<br>lower part of pinnacle                                                                                                                                         |                          | 240       |
|           |        |          | Center tower – buttress – details                                                                                                                                                                                   |                          | 241       |
|           |        |          | Entrance shields – details – front elev., side elev.,<br>horizontal section                                                                                                                                         |                          | 242       |
|           |        | 15 of 15 | Entrance shields – details – left & right shield – front<br>elevation                                                                                                                                               |                          | 243-245   |
|           |        |          | Vent stack flashing;<br>Scuttle detail;<br>Conductor spilling on roof – detail                                                                                                                                      | 6                        | 303       |
|           |        |          | Roof flashing;<br>Tower coping flashing;<br>Penthouse gutter                                                                                                                                                        |                          | 304       |
|           |        |          | Torsion operator for window no. 217M – detail                                                                                                                                                                       |                          | 305       |
| All other | 4      | 1 of 4   | Chemistry building                                                                                                                                                                                                  | 6                        | n/a - all |
|           |        | 2 of 4   | Chemistry building                                                                                                                                                                                                  | 6                        | “         |
|           |        | 3 of 4   | Chemistry building                                                                                                                                                                                                  | 6                        | “         |
|           |        | 4 of 4   | Chemistry building                                                                                                                                                                                                  | 5                        | “         |
|           |        | 1 of 1   | Memorial Chapel – lighting plan, c. 1919-1920                                                                                                                                                                       | 2                        | “         |
|           |        | 1 of 1   | Block plan, c. 1919-1920 [ pos. early proposal for<br>campus – library building does not appear on this<br>plan ];<br>Map showing contours, sewers, water mains of Fisk<br>University grounds, n.d. [c. 1919-1920?] | 2                        | “         |
|           |        | 1 of 1   | Laundry building, c. July – Aug. 1920;<br>Temporary gymnasium, n.d.                                                                                                                                                 | 6                        | “         |
|           |        | 1 of 1   | Retaining wall plans [pos. for power house, laundry,<br>or enclosed houses];<br>505, 507 16 <sup>th</sup> Avenue North [sketches/drawings]                                                                          | 9                        | “         |
|           |        | 1 of 1   | Fisk University – Plat map of properties, n.d.<br><b>[IMPORTANT: Fort Gillem site is identified on</b>                                                                                                              | 1                        | “         |

| BUILDING     | DRAWER | FOLDER | ITEM LEVEL DESCRIPTION<br>Note: Library Building is the primary structure in this group                                        | ITEM COUNT<br>PER FOLDER | PLAN #              |
|--------------|--------|--------|--------------------------------------------------------------------------------------------------------------------------------|--------------------------|---------------------|
|              |        |        | <b>this map! See map folder for details.]</b>                                                                                  |                          |                     |
|              |        |        |                                                                                                                                |                          |                     |
| <b>NOTE:</b> |        |        | <b><u>Duplicate copies</u></b> of some Fisk library plans are located in two rolled storage boxes on shelf 14 in the map room. |                          |                     |
|              |        | Box 1  |                                                                                                                                |                          | 1-18                |
|              |        | Box 2  |                                                                                                                                |                          | 102-104,<br>107-111 |



# Henry C. Hibbs Papers, 1882 – c. 1988

## Appendix B

### Scarritt College – Plans

| DRAWER | ARCHITECT'S ORIGINAL ORDER<br>(how architect grouped<br>these materials before they<br>were processed) | FOLDER | ITEM LEVEL DESCRIPTION<br><b>Note:</b><br>1.) "North Unit" = Administration<br>"Central Unit" = Social building<br>2.) [ Brackets ] denote language / labels added by<br>processor | ITEM<br>COUNT<br>PER FOLDER | PLAN # |
|--------|--------------------------------------------------------------------------------------------------------|--------|------------------------------------------------------------------------------------------------------------------------------------------------------------------------------------|-----------------------------|--------|
| 11     | Mantel Inscriptions                                                                                    | 1 of 1 | [ Sketches ]                                                                                                                                                                       | 8                           | n/a    |
|        | Plans, 300 to 320                                                                                      | 1 of 4 |                                                                                                                                                                                    | 7                           |        |
|        |                                                                                                        |        | Cornerstone, detail of                                                                                                                                                             |                             | 301    |
|        |                                                                                                        |        | Dining hall & kitchen – east of – proposed oil tank<br>location                                                                                                                    |                             | 304    |
|        |                                                                                                        |        | Windows nos. 102 & 103 – revised radiator recess<br>under                                                                                                                          |                             | 305    |
|        |                                                                                                        |        | Steps opening 117 – 119 – detail of                                                                                                                                                |                             | 306    |
|        |                                                                                                        |        | Central unit – section fireplace hearth                                                                                                                                            |                             | 307    |
|        |                                                                                                        |        | [Unidentified sketch – note re: Peabody College? ]                                                                                                                                 |                             | n/a    |
|        |                                                                                                        |        | First aid cabinets – detail of                                                                                                                                                     |                             | 312    |
|        |                                                                                                        | 2 of 4 |                                                                                                                                                                                    | 6                           |        |
|        |                                                                                                        |        | Tower – top base mould – VOID                                                                                                                                                      |                             | 313    |
|        |                                                                                                        |        | Tower – top base mould                                                                                                                                                             |                             | 314    |
|        |                                                                                                        |        | Dining hall & kitchen – detail door #19                                                                                                                                            |                             | 315    |
|        |                                                                                                        |        | Central unit – end elevations                                                                                                                                                      |                             | 316    |
|        |                                                                                                        |        | Central unit – revised chimneys                                                                                                                                                    |                             | 319    |
|        |                                                                                                        |        | [Unidentified drawing – information desk / library<br>reference desk? ]                                                                                                            |                             | n/a    |
|        |                                                                                                        | 3 of 4 |                                                                                                                                                                                    | 3                           |        |
|        |                                                                                                        |        | Tower – foundation – ¼" plan                                                                                                                                                       |                             | 302    |
|        |                                                                                                        |        | Cloister A foundation – ¼" plan                                                                                                                                                    |                             | 303    |
|        |                                                                                                        |        | Truss "B" – two acceptable splice details                                                                                                                                          |                             | 317    |
|        | Plans, 321 to 339                                                                                      | 1 of 3 |                                                                                                                                                                                    | 6                           |        |
|        |                                                                                                        |        | East wall                                                                                                                                                                          |                             | 331    |
|        |                                                                                                        |        | Dining hall – plan of marble floor                                                                                                                                                 |                             | 335    |
|        |                                                                                                        |        | Tower – north wall – west buttress – detail of<br>flashing                                                                                                                         |                             | 336    |
|        |                                                                                                        |        | Social rooms – elevation of arch – bay window                                                                                                                                      |                             | 337    |

| DRAWER | ARCHITECT'S ORIGINAL ORDER<br>(how architect grouped<br>these materials before they<br>were processed) | FOLDER | ITEM LEVEL DESCRIPTION<br><u>Note:</u><br>1.) "North Unit" = Administration<br>"Central Unit" = Social building<br>2.) [ Brackets ] denote language / labels added by<br>processor | ITEM<br>COUNT<br>PER FOLDER | PLAN # |
|--------|--------------------------------------------------------------------------------------------------------|--------|------------------------------------------------------------------------------------------------------------------------------------------------------------------------------------|-----------------------------|--------|
|        |                                                                                                        |        | Central unit – mould of fireplace breasts                                                                                                                                          |                             | 324    |
|        |                                                                                                        |        | Central unit – lobby to social rooms – elevation of<br>arch                                                                                                                        |                             | 326    |
|        |                                                                                                        | 2 of 3 |                                                                                                                                                                                    | 7                           |        |
|        |                                                                                                        |        | Kitchen – chimney detail                                                                                                                                                           |                             | 321    |
|        |                                                                                                        |        | Director's room – block panel for fan                                                                                                                                              |                             | 322    |
|        |                                                                                                        |        | Tower – wall cap "A"                                                                                                                                                               |                             | 323    |
|        |                                                                                                        |        | Tower – buttress caps A, B, C – detail                                                                                                                                             |                             | 328    |
|        |                                                                                                        |        | Central unit – herringbone floors, ¼" plan                                                                                                                                         |                             | 329    |
|        |                                                                                                        |        | Dining hall & kitchen – terrace walls & copings                                                                                                                                    |                             | 330    |
|        |                                                                                                        |        | North unit – lobby – elevations of arches                                                                                                                                          |                             | 332    |
|        | Plans, 340 to 359                                                                                      | 1 of 3 |                                                                                                                                                                                    | 9                           |        |
|        |                                                                                                        |        | 1 <sup>st</sup> story – restroom – mirror mould                                                                                                                                    |                             | n/a    |
|        |                                                                                                        |        | Central unit – 2 <sup>nd</sup> story – detail of doors in<br>passageway                                                                                                            |                             | 342    |
|        |                                                                                                        |        | Belle H. Bennett Memorial – detail of doors in<br>passageway                                                                                                                       |                             | 343    |
|        |                                                                                                        |        | Chapel – side aisle pier & arches                                                                                                                                                  |                             | 344    |
|        |                                                                                                        |        | North unit – lobby steps – 1" detail                                                                                                                                               |                             | 345    |
|        |                                                                                                        |        | [ No unit i.d. ] – soffitt of arch btw side aisle & nave –<br>detail                                                                                                               |                             | 346    |
|        |                                                                                                        |        | [ No unit i.d. ] – basement – doors on stairs details                                                                                                                              |                             | 348    |
|        |                                                                                                        |        | North unit – offices E & F to corridor – business<br>windows                                                                                                                       |                             | 349    |
|        |                                                                                                        |        | North unit – terrace east of                                                                                                                                                       |                             | 350    |
|        |                                                                                                        | 2 of 3 |                                                                                                                                                                                    | 8                           |        |
|        |                                                                                                        |        | Information desk – plans showing revisions to                                                                                                                                      |                             | 351    |
|        |                                                                                                        |        | North unit – walk north of                                                                                                                                                         |                             | 352    |
|        |                                                                                                        |        | Chapel – rooms 105 & 107 – ½" detail of base                                                                                                                                       |                             | 353    |
|        |                                                                                                        |        | North unit – door no. 121 – detail of steps at                                                                                                                                     |                             | 356    |
|        |                                                                                                        |        | Chapel – balcony rail coping                                                                                                                                                       |                             | 358    |
|        |                                                                                                        |        | Memorial room – ¼" plan – VOID/revised                                                                                                                                             |                             | 359    |
|        |                                                                                                        |        | Memorial room – ¼" plan – VOID/revised                                                                                                                                             |                             | 359    |

| DRAWER | ARCHITECT'S ORIGINAL ORDER<br>(how architect grouped<br>these materials before they<br>were processed) | FOLDER | ITEM LEVEL DESCRIPTION<br><u>Note:</u><br>1.) "North Unit" = Administration<br>"Central Unit" = Social building<br>2.) [ Brackets ] denote language / labels added by<br>processor | ITEM<br>COUNT<br>PER FOLDER | PLAN #         |
|--------|--------------------------------------------------------------------------------------------------------|--------|------------------------------------------------------------------------------------------------------------------------------------------------------------------------------------|-----------------------------|----------------|
|        |                                                                                                        |        | Memorial room – ¼" plan – VOID/revised                                                                                                                                             |                             | 359            |
|        | Plans, 360 to 380                                                                                      | 1 of 2 |                                                                                                                                                                                    | 4                           |                |
|        |                                                                                                        |        | Chapel - ½" section thru stairs to balcony                                                                                                                                         |                             | 361            |
|        |                                                                                                        |        | Main entrance – jamb                                                                                                                                                               |                             | 368            |
|        |                                                                                                        |        | Chapel – door from balcony to stairs - ½" detail of –<br>revised                                                                                                                   |                             | 360            |
|        |                                                                                                        |        | North unit – walk & steps – north of – typical jointing                                                                                                                            |                             | 367            |
|        | Plans, 373-A                                                                                           | 1 of 1 |                                                                                                                                                                                    | 1                           |                |
|        |                                                                                                        |        | Chapel – communion table inscription – "This Do In<br>Remembrance of Me"                                                                                                           |                             | 373-A          |
|        | Plans, 371, 375, 501, 502 &<br>Chapel Seating                                                          | 1 of 2 |                                                                                                                                                                                    | 10 +<br>processing<br>note  |                |
|        |                                                                                                        |        | Chapel – pulpit detail [ sketch ]                                                                                                                                                  |                             | n/a            |
|        |                                                                                                        |        | [ Chapel – seating – not id'd ]                                                                                                                                                    |                             | n/a            |
|        |                                                                                                        |        | [ Chapel – pews ] for Southwestern Prayer Room<br>1947                                                                                                                             |                             | n/a            |
|        |                                                                                                        |        | Hat rack – details                                                                                                                                                                 |                             | 375            |
|        |                                                                                                        |        | [ Pulpit chair? – not id'd ]                                                                                                                                                       |                             | 501            |
|        |                                                                                                        |        | [Chapel seating? – not id'd ]                                                                                                                                                      |                             | n/a            |
|        |                                                                                                        |        | [Chapel?] – Southwestern Prayer Room 1947 [chair<br>panels?]                                                                                                                       |                             | n/a            |
|        |                                                                                                        |        | Chapel – seating plan [ 3 of these ]                                                                                                                                               |                             | n/a            |
| 12     | Wall, Sample & Details                                                                                 | 1 of 1 |                                                                                                                                                                                    | 2                           | A & B          |
|        | Plans, 300 to 320                                                                                      | 4 of 4 |                                                                                                                                                                                    | 9                           |                |
|        |                                                                                                        |        | Door 101, spandrel for                                                                                                                                                             |                             | 308            |
|        |                                                                                                        |        | Door 101, spandrel for                                                                                                                                                             |                             | 309            |
|        |                                                                                                        |        | Door 103 & 121, spandrel for                                                                                                                                                       |                             | 310            |
|        |                                                                                                        |        | Door 113, spandrel for                                                                                                                                                             |                             | 308-<br>311[?] |
|        |                                                                                                        |        | Chapel, door 103 & 119 – inside spandrel for                                                                                                                                       |                             | n/a            |
|        |                                                                                                        |        | Chapel, door 110 & 113 – outside spandrel for                                                                                                                                      |                             | n/a            |
|        |                                                                                                        |        | Chapel, door 103 & 119 – outside spandrel for                                                                                                                                      |                             | n/a            |

| DRAWER | ARCHITECT'S ORIGINAL ORDER<br>(how architect grouped<br>these materials before they<br>were processed) | FOLDER | ITEM LEVEL DESCRIPTION<br><u>Note:</u><br>1.) "North Unit" = Administration<br>"Central Unit" = Social building<br>2.) [ Brackets ] denote language / labels added by<br>processor | ITEM<br>COUNT<br>PER FOLDER | PLAN # |
|--------|--------------------------------------------------------------------------------------------------------|--------|------------------------------------------------------------------------------------------------------------------------------------------------------------------------------------|-----------------------------|--------|
|        |                                                                                                        |        | Chapel, door 110 & 113 – inside spandrel for                                                                                                                                       |                             | n/a    |
|        |                                                                                                        |        | Kitchen – chimney details                                                                                                                                                          |                             | 320    |
|        | Plans, 321 to 339                                                                                      | 3 of 3 |                                                                                                                                                                                    | 6                           |        |
|        |                                                                                                        |        | Central unit – door 101 – section spandrel                                                                                                                                         |                             | 324    |
|        |                                                                                                        |        | Dining hall & kitchen – exterior doors, typical detail of<br>splayed jamb                                                                                                          |                             | 325    |
|        |                                                                                                        |        | Lecture room – stage details                                                                                                                                                       |                             | 327    |
|        |                                                                                                        |        | Heating diagram                                                                                                                                                                    |                             |        |
|        |                                                                                                        |        | Dining hall & kitchen – door 101 – detail of<br>monogram over                                                                                                                      |                             | 339    |
|        |                                                                                                        |        | Chapel – doors 101, 119, 103 – inscriptions:<br>"I am the Way and the Truth and the Life"; "I am the<br>Light of the World"; "I am the Bread of Life"                              |                             | 338    |
|        | Plans, 340 to 359                                                                                      | 3 of 3 |                                                                                                                                                                                    | 7                           |        |
|        |                                                                                                        |        | Tower – 2 <sup>nd</sup> story details                                                                                                                                              |                             | 340    |
|        |                                                                                                        |        | Chapel – door 101 – inscription over reads "I am the<br>way"                                                                                                                       |                             | 341A   |
|        |                                                                                                        |        | Chapel – door 101 – inscription over reads "and the<br>Truth and the Life"                                                                                                         |                             | 341B   |
|        |                                                                                                        |        | Chapel – detail of arch btw nave & side aisle                                                                                                                                      |                             | 347    |
|        |                                                                                                        |        | Chapel – ceiling plan of                                                                                                                                                           |                             | 354    |
|        |                                                                                                        |        | Chapel – organ room – window to – revised head &<br>jamb mullions                                                                                                                  |                             | 355    |
|        |                                                                                                        |        | Social rooms – book case doors                                                                                                                                                     |                             | 357    |
|        | Plans, 360 to 380                                                                                      | 2 of 2 |                                                                                                                                                                                    | 5                           |        |
|        |                                                                                                        |        | Chapel – vestibule lobby & side aisle – panel for<br>lighting fixture                                                                                                              |                             | 362    |
|        |                                                                                                        |        | Chapel – panel in side aisle ceiling                                                                                                                                               |                             | 363    |
|        |                                                                                                        |        | Chapel – walks – plan of                                                                                                                                                           |                             | 366    |
|        |                                                                                                        |        | "Office" sign                                                                                                                                                                      |                             | 376    |
|        |                                                                                                        |        | North unit, central unit – ventilators – scale detail of                                                                                                                           |                             | 377    |
|        | Chapel and Other Plans – [ Plans, 371 to 374, 502,                                                     | 2 of 2 |                                                                                                                                                                                    | 8                           |        |

| DRAWER | ARCHITECT'S ORIGINAL ORDER<br>(how architect grouped<br>these materials before they<br>were processed) | FOLDER     | ITEM LEVEL DESCRIPTION<br><u>Note:</u><br>1.) "North Unit" = Administration<br>"Central Unit" = Social building<br>2.) [ Brackets ] denote language / labels added by<br>processor | ITEM<br>COUNT<br>PER FOLDER | PLAN # |
|--------|--------------------------------------------------------------------------------------------------------|------------|------------------------------------------------------------------------------------------------------------------------------------------------------------------------------------|-----------------------------|--------|
|        | Furniture Layout ]                                                                                     |            |                                                                                                                                                                                    |                             |        |
|        |                                                                                                        |            | Chapel – communion table – inscription – "This do in remembrance of me"                                                                                                            |                             | 373A   |
|        |                                                                                                        |            | Furniture layout [ overview ] – includes President's office, lobby, social room, faculty room, student's room & hall, dining hall, library, stack rooms                            |                             | n/a    |
|        |                                                                                                        |            | [ Chapel ] – seating plan                                                                                                                                                          |                             | B      |
|        |                                                                                                        |            | [ Chapel ] – pews, details of                                                                                                                                                      |                             | 371    |
|        |                                                                                                        |            | [ Chapel ] – pew, end of                                                                                                                                                           |                             | 372    |
|        |                                                                                                        |            | [ Chapel ] – communion table                                                                                                                                                       |                             | 373    |
|        |                                                                                                        |            | [ Chapel ] – pulpit & pew rail; rail in front of pews                                                                                                                              |                             | 374    |
|        |                                                                                                        |            | [Chapel?] – chair details                                                                                                                                                          |                             | 502    |
|        | Library Charge Gate & Ceiling Design                                                                   | 1, 1A of 1 |                                                                                                                                                                                    | 3                           |        |
|        |                                                                                                        |            | Library ceiling – stencil [ 2 items ]                                                                                                                                              |                             | n/a    |
|        |                                                                                                        |            | North unit, library – charging window gate detail                                                                                                                                  |                             | 138A   |
| 13     | Detail Sketches                                                                                        | 1 of 8     |                                                                                                                                                                                    | 10                          |        |
|        |                                                                                                        |            | [sketch – small unid'd interior ]                                                                                                                                                  |                             | n/a    |
|        |                                                                                                        |            | [North unit – exterior elevation]                                                                                                                                                  |                             | n/a    |
|        |                                                                                                        |            | [Chapel – exterior elevation]                                                                                                                                                      |                             | n/a    |
|        |                                                                                                        |            | [Unid'd – information / reference desk?]                                                                                                                                           |                             | n/a    |
|        |                                                                                                        |            | [Chapel – exterior detail] [2 items]                                                                                                                                               |                             | n/a    |
|        |                                                                                                        |            | [Cloister? – exterior detail]                                                                                                                                                      |                             | n/a    |
|        |                                                                                                        |            | [Chapel? – exterior detail]                                                                                                                                                        |                             | n/a    |
|        |                                                                                                        |            | Chapel – aerial seating diagram, Dec. 22, 1924                                                                                                                                     |                             | n/a    |
|        |                                                                                                        |            | Chapel – aerial seating diagram, Dec. 20, 1924                                                                                                                                     |                             | n/a    |
|        |                                                                                                        | 2 of 8     |                                                                                                                                                                                    | 9                           |        |
|        |                                                                                                        |            | [unid'd sketch ]                                                                                                                                                                   |                             | n/a    |
|        |                                                                                                        |            | [North unit – exterior elevation – various views, some unapproved ]                                                                                                                |                             | n/a    |
|        |                                                                                                        |            | [Chapel – side elevation ]                                                                                                                                                         |                             | n/a    |
|        |                                                                                                        | 3 of 8     |                                                                                                                                                                                    | 10                          |        |
|        |                                                                                                        |            | Social / Central unit – 1 <sup>st</sup> & 2 <sup>nd</sup> story floor plans – all                                                                                                  |                             | n/a    |

| DRAWER | ARCHITECT'S ORIGINAL ORDER<br>(how architect grouped<br>these materials before they<br>were processed) | FOLDER | ITEM LEVEL DESCRIPTION<br><u>Note:</u><br>1.) "North Unit" = Administration<br>"Central Unit" = Social building<br>2.) [ Brackets ] denote language / labels added by<br>processor | ITEM<br>COUNT<br>PER FOLDER | PLAN # |
|--------|--------------------------------------------------------------------------------------------------------|--------|------------------------------------------------------------------------------------------------------------------------------------------------------------------------------------|-----------------------------|--------|
|        |                                                                                                        | 4 of 8 |                                                                                                                                                                                    | 7                           |        |
|        |                                                                                                        |        | Social / Central unit – 1 <sup>st</sup> & 2 <sup>nd</sup> story floor plans – all                                                                                                  |                             | n/a    |
|        |                                                                                                        | 5 of 8 |                                                                                                                                                                                    | 6                           |        |
|        |                                                                                                        |        | [Scarritt group – exterior elevations, general sketch]                                                                                                                             |                             | n/a    |
|        |                                                                                                        |        | [Scarritt group – exterior elevations, detailed sketch]                                                                                                                            |                             | n/a    |
|        |                                                                                                        |        | Archways / doorways – drawing                                                                                                                                                      |                             | n/a    |
|        |                                                                                                        |        | [Scarritt group – floor plan, basic (interior)]                                                                                                                                    |                             | n/a    |
|        |                                                                                                        |        | [Scarritt group – floor plan, detailed (interior)]                                                                                                                                 |                             | n/a    |
|        |                                                                                                        |        | [Scarritt group – floor plan, detailed and door<br>schedule]                                                                                                                       |                             | n/a    |
|        |                                                                                                        | 6 of 8 |                                                                                                                                                                                    | 15                          |        |
|        |                                                                                                        |        | [Exterior views of various bldg details]                                                                                                                                           |                             | n/a    |
|        |                                                                                                        |        | [Floor plans – general]                                                                                                                                                            |                             | n/a    |
|        |                                                                                                        | 7 of 8 |                                                                                                                                                                                    | 6                           |        |
|        |                                                                                                        |        | [Scarritt group – front elevation of campus –<br>completed & detailed - 2 of these, different details]                                                                             |                             | n/a    |
|        |                                                                                                        |        | [Scarritt group – front elevation – drawings – 3<br>views]                                                                                                                         |                             | n/a    |
|        |                                                                                                        |        | Perspective drawing – showing light angles off of<br>Tower (?)                                                                                                                     |                             | n/a    |
|        |                                                                                                        | 8 of 8 |                                                                                                                                                                                    | 4                           |        |
|        |                                                                                                        |        | [Scarritt group] – 1 <sup>st</sup> story plan                                                                                                                                      |                             | n/a    |
|        |                                                                                                        |        | [Scarritt group] – west, south elevations – [basic, not<br>detailed]                                                                                                               |                             | n/a    |
|        |                                                                                                        |        | [Scarritt group] – 2 <sup>nd</sup> story plan                                                                                                                                      |                             | n/a    |
|        |                                                                                                        |        | [Scarritt group] – north, east elevations                                                                                                                                          |                             | n/a    |
|        | Inscription, "Attempt Great<br>Things for God"                                                         | 1 of 1 |                                                                                                                                                                                    | 1                           | n/a    |
| 14     | Miscellaneous Plan &<br>Sketches                                                                       | 1 of 4 |                                                                                                                                                                                    | 9                           |        |
|        |                                                                                                        |        | Central unit – entrance hall                                                                                                                                                       |                             | 1      |
|        |                                                                                                        |        | Doors no. 103 & 121 – steps at                                                                                                                                                     |                             | 2      |
|        |                                                                                                        |        | Central unit – lecture room – stage                                                                                                                                                |                             | 3      |

| DRAWER | ARCHITECT'S ORIGINAL ORDER<br>(how architect grouped<br>these materials before they<br>were processed) | FOLDER | ITEM LEVEL DESCRIPTION<br><u>Note:</u><br>1.) "North Unit" = Administration<br>"Central Unit" = Social building<br>2.) [ Brackets ] denote language / labels added by<br>processor | ITEM<br>COUNT<br>PER FOLDER | PLAN # |
|--------|--------------------------------------------------------------------------------------------------------|--------|------------------------------------------------------------------------------------------------------------------------------------------------------------------------------------|-----------------------------|--------|
|        |                                                                                                        |        | Central unit – doors – passage                                                                                                                                                     |                             | 4      |
|        |                                                                                                        |        | North unit – library – book cases                                                                                                                                                  |                             | 5      |
|        |                                                                                                        |        | Central unit – south end                                                                                                                                                           |                             | 6      |
|        |                                                                                                        |        | Dining hall – basement – change in office toilet<br>(janitor's room)                                                                                                               |                             | n/a    |
|        |                                                                                                        |        | [ unid'd - paneling ]                                                                                                                                                              |                             | n/a    |
|        |                                                                                                        |        | [ unid'd – notes ]                                                                                                                                                                 |                             | n/a    |
|        |                                                                                                        | 2 of 4 |                                                                                                                                                                                    | 8                           |        |
|        |                                                                                                        |        | 2 <sup>nd</sup> floor – framing plan                                                                                                                                               |                             | 7      |
|        |                                                                                                        |        | Doorway – [unid'd sketch]                                                                                                                                                          |                             | n/a    |
|        |                                                                                                        |        | [Window / plaque? – unid'd sketch]                                                                                                                                                 |                             | n/a    |
|        |                                                                                                        |        | Library section                                                                                                                                                                    |                             | n/a    |
|        |                                                                                                        |        | Chapel – entrance door – sketches                                                                                                                                                  |                             | n/a    |
|        |                                                                                                        |        | [ unid'd sketches ]                                                                                                                                                                |                             | n/a    |
|        |                                                                                                        | 3 of 4 |                                                                                                                                                                                    | 7                           |        |
|        |                                                                                                        |        | [Chapel (?) – pulpit – detailed drawing]                                                                                                                                           |                             | n/a    |
|        |                                                                                                        |        | Chapel – interior – brick dimensions                                                                                                                                               |                             | n/a    |
|        |                                                                                                        |        | Social bldg – section thru stairs                                                                                                                                                  |                             | n/a    |
|        |                                                                                                        |        | [ unid'd – but looks same as one above]                                                                                                                                            |                             | n/a    |
|        |                                                                                                        |        | Panels – elevation                                                                                                                                                                 |                             | n/a    |
|        |                                                                                                        |        | Panels – elevation                                                                                                                                                                 |                             | n/a    |
|        |                                                                                                        |        | Toilet – revised                                                                                                                                                                   |                             | n/a    |
|        |                                                                                                        | 4 of 4 |                                                                                                                                                                                    | 6                           |        |
|        |                                                                                                        |        | [Unid'd – paneling – sketch]                                                                                                                                                       |                             | n/a    |
|        |                                                                                                        |        | Archway & lettering – "The World Is My Parish"                                                                                                                                     |                             | n/a    |
|        |                                                                                                        |        | Unid'd – arches / paneling [ 2 ]                                                                                                                                                   |                             | n/a    |
|        |                                                                                                        |        | South cloister – arches & ceiling                                                                                                                                                  |                             | n/a    |
|        |                                                                                                        |        | Central unit – south end – half elevation                                                                                                                                          |                             | n/a    |
|        | Dorm Sketches [Fondren<br>Hall?]                                                                       | 1 of 1 |                                                                                                                                                                                    | 4                           |        |
|        |                                                                                                        |        | 1 <sup>st</sup> story – floor plan                                                                                                                                                 |                             | n/a    |
|        |                                                                                                        |        | 2 <sup>nd</sup> story – floor plan                                                                                                                                                 |                             | n/a    |
|        |                                                                                                        |        | Dining hall & tower – very general sketch                                                                                                                                          |                             | n/a    |

| DRAWER | ARCHITECT'S ORIGINAL ORDER<br>(how architect grouped<br>these materials before they<br>were processed) | FOLDER | ITEM LEVEL DESCRIPTION<br><u>Note:</u><br>1.) "North Unit" = Administration<br>"Central Unit" = Social building<br>2.) [ Brackets ] denote language / labels added by<br>processor | ITEM<br>COUNT<br>PER FOLDER | PLAN #    |
|--------|--------------------------------------------------------------------------------------------------------|--------|------------------------------------------------------------------------------------------------------------------------------------------------------------------------------------|-----------------------------|-----------|
|        |                                                                                                        |        | [Dorm room? – dresser, table – very general sketch]                                                                                                                                |                             | n/a       |
|        | Scarritt Dormitory [Fondren?]                                                                          | 1 of 1 |                                                                                                                                                                                    | 1                           |           |
|        |                                                                                                        |        | Mantel detail                                                                                                                                                                      |                             | n/a       |
|        | Fondren Hall                                                                                           | 1 of 1 |                                                                                                                                                                                    | 6                           |           |
|        |                                                                                                        |        | Prayer room (c. 1949)                                                                                                                                                              |                             | n/a       |
|        |                                                                                                        |        | Educational building                                                                                                                                                               |                             | n/a       |
|        | Fondren Hall, Plaque for                                                                               | 1 of 1 |                                                                                                                                                                                    | 1                           |           |
|        |                                                                                                        |        | Inscription panel, south wall, west entrance vault –<br>"The son of man came not to be ministered unto but<br>to minister. Matthew 20-28"                                          |                             | 219       |
|        | Lantern, Slate Roof Plan by M-<br>W [Meierjohan-Wengler]                                               | 1 of 1 | Note: processor assumes these plans were used for<br>Scarritt                                                                                                                      | 4                           | n/a       |
|        |                                                                                                        |        | Slate roof – Oldetex architectural graduated                                                                                                                                       |                             |           |
|        |                                                                                                        |        | Pocket lantern – full size details                                                                                                                                                 |                             |           |
|        |                                                                                                        |        | Bracket lantern – full size details                                                                                                                                                |                             |           |
|        |                                                                                                        |        | Bronze lantern – detail for Henry C. Hibbs, architect                                                                                                                              |                             |           |
|        | Letters, Various Sketches                                                                              | 1 of 1 |                                                                                                                                                                                    | 40-50 est.                  |           |
|        | 8 ½" Capital Letters, Sketches                                                                         | 1 of 1 |                                                                                                                                                                                    | 9                           |           |
| 15     | Tower for Scarritt, also<br>Southwestern                                                               | 1 of 4 | [Spire – detail – torn]                                                                                                                                                            | 1                           | n/a       |
|        |                                                                                                        | 2 of 4 | [Spire – sketches & details]                                                                                                                                                       | 6                           | n/a       |
|        |                                                                                                        | 3 of 4 | Foundation & base course                                                                                                                                                           | 3                           | n/a – all |
|        |                                                                                                        |        | [Tower view – drawing]                                                                                                                                                             |                             |           |
|        |                                                                                                        |        | [Tower view – angled, drawing]                                                                                                                                                     |                             |           |
|        |                                                                                                        | 4 of 4 | [Tower – layered drawings of tower details –<br><b>EXTREMELY FRAGILE – IN NEED OF MAJOR<br/>CONSERVATION WORK]</b>                                                                 | 6                           | n/a       |
